# Supplementary material for: Characterization of γ-Cadinene Enzymes in Ganoderma lucidum and Ganoderma sinensis from Basidiomycetes Provides Insight into the Identification of Terpenoid Synthases
Source: PubMed Central journal article supplement — ACS Omega. 2022 Feb 16;7(8):7229–39. doi: 10.1021/acsomega.1c06792 (PMC8892675; doi:10.1021/acsomega.1c06792), 2022-02-16
Supplement: ao1c06792_si_001.pdf [file ao1c06792_si_001.pdf]

**SUPPORTING INFORMATION:**

**Supporting information to Characterization of  $\gamma$ -cadinene enzymes in *Ganoderma lucidum* and *Ganoderma sinensis* from Basidiomycetes provides insight into the identification of terpenoid synthases**

Rui Cao<sup>a</sup>, Xinlong Wu<sup>b</sup>, Qi Wang<sup>a</sup>, Pengyan Qi<sup>a</sup>, Yuna Zhang<sup>a</sup>, Lizhi Wang<sup>a\*</sup> and Chao Sun<sup>c\*</sup>

<sup>a</sup>*School of Chinese Materia Medica, Tianjin University of Traditional Chinese Medicine, Tianjin 301617, P. R. China*

<sup>b</sup>*College of Pharmaceutical Engineering of Traditional Chinese Medicine, Tianjin University of Traditional Chinese Medicine, Tianjin, 301617, P. R. China*

<sup>c</sup>*Institute of Medicinal Plant Development, Chinese Academy of Medical Sciences and Peking Union Medical College, Beijing 100193, P. R. China*

\*To whom correspondence should be addressed:

**Lizhi Wang** – School of Chinese Materia Medica, Tianjin University of Traditional Chinese Medicine, Tianjin 301617, China, orcid.org/0000-0003-4719-6285, E-mail: wanglz2013@tjutcm.edu.cn Tel: +86-022-59596225

**Chao Sun** – Institute of Medicinal Plant Development, Chinese Academy of Medical Sciences and Peking Union Medical College, Beijing 100193, P. R. China, E-mail: csun@implad.ac.cn Tel: +86-010-57833197, Fax:+86-010-57833197

**Table S1. The products, protein ID and exon number of published STSs from Basidiomycetes.**

| Species names and references      | Terpene synthase | Main product(s)       | Accession No / Protein ID | Number of exons |
|-----------------------------------|------------------|-----------------------|---------------------------|-----------------|
| <i>Agrotype aegerita</i><br>[1]   | Agr1             | □ delta-Cadinene      | MN146024                  | 4               |
|                                   | Agr2             | Viridiflorene         | MN146025                  | 5               |
|                                   | Agr3             | □ alpha-Muurolene     | MN146026                  | 7               |
|                                   | Agr4             | delta-Cadinene        | MN146027                  | 5               |
|                                   | Agr5             | Viridiflorol          | MN146028                  | 6               |
|                                   | Agr6             | delta-6-Protoilludene | MN146029                  | 6               |
|                                   | Agr7             | delta-6-Protoilludene | MN146030                  | 6               |
|                                   | Agr8             | □ gamma-Muurolene     | MN146031                  | 5               |
| <i>Antrodia cinnamomea</i><br>[2] | AcTPS4           | zonarene              | EIW57364                  | 3               |
|                                   | AcTPS5           | T-cadinol             | EJF64719                  | 4               |
|                                   | AcTPS7           | nerolidol             | EIW53985                  | 9               |
|                                   | AcTPS9           | 1-epi-cubenol         | EIW57365                  | 3               |
| <i>Armillaria Gallica</i> [3]     | Pro1             | delta-6-protoilludene | P0DL13/<br>PBK84744       | 9               |

**Table S1 (continued)**

|                                              |               |                                       |                |    |
|----------------------------------------------|---------------|---------------------------------------|----------------|----|
|                                              | CpSTS1        | sterprene                             | LC436345       | 5  |
|                                              | CpSTS2        | alpha-cubebene,<br>delta-cadinene     | LC436346       | 5  |
|                                              | CpSTS3        | alpha-muurolene,<br>delta-cadinol     | LC436347       | 6  |
|                                              | CpSTS4        | delta-6-protoilludene                 | LC436348       | 5  |
|                                              | CpSTS5        | gamma-muurolene,<br>alpha-muurolene   | LC436349       | 4  |
| <i>Clitopilus<br/>pseudo-pinsitus</i><br>[4] | CpSTS6        | pentalene                             | LC436350       | 6  |
|                                              | CpSTS7        | alpha-farnesene                       | LC436351       | 5  |
|                                              | CpSTS8        | alloaromadendrene                     | LC436352       | 5  |
|                                              | CpSTS9        | ledene, virifloridol                  | LC436353       | 5  |
|                                              | CpSTS11       | 9-alloaromadendrene                   | LC436355       | 5  |
|                                              | CpSTS12       | beta-elemene, ledene,<br>virifloridol | LC436356       | 5  |
|                                              | CpSTS13       | ledene                                | LC436357       | 5  |
|                                              | CpSTS14       | beta-elemene,<br>beta-farnesene       | LC436358       | 3  |
|                                              | CpSTS16       | aristolene                            | LC436360       | 5  |
|                                              | CpSTS17       | beta-caryophyllene                    | LC436361       | 3  |
|                                              | CpSTS18       | gamma-cadinene                        | LC436362       | 9  |
| <i>Coniophora<br/>puteana</i><br>[5]         | Copu2         | □ beta-Copaene                        | XP_007771895   | 3  |
|                                              | Copu3         | Cubebol                               | XP_007765978   | 3  |
| <i>Coprinopsis<br/>cinerea</i><br>[6]        | Cop1          | Germacrene A                          | EAU89322       | 10 |
|                                              | Cop2          | Germacrene A                          | EAU85264       | 4  |
|                                              | Cop3          | □ alpha-Muurolene,<br>Germacrene A    | EAU88892       | 7  |
|                                              | Cop4          | □ delta-Cadinene,<br>beta-copaene     | EAU85540       | 5  |
|                                              | Cop6          | □ alpha-Cuprenene                     | EAU89298       | 5  |
| <i>Dendrothele<br/>bispora</i> [1]           | Denbi1_659367 | delta-6-protoilludene                 | JGI ID: 659367 | 5  |
|                                              | Denbi1_816208 | Viridiflorol                          | JGI ID: 816208 | 5  |
| <i>Fomitopsis<br/>pinicola</i> [7]           | Fompi1        | □ alpha-Cuprenene                     | EPT01290       | 5  |
| <i>Galerina</i>                              | Galma_104215  | □ beta-Gurjunene                      | JGI ID: 104215 | 5  |

|                                    |                             |                                                   |                |                |
|------------------------------------|-----------------------------|---------------------------------------------------|----------------|----------------|
| <i>marginata</i> [1]               |                             |                                                   |                |                |
| <i>Heterobasidion annosum</i> [1]  | Hetan2_454193               | delta-6-protoilludene                             | JGI ID: 454193 | 5              |
| <b>Table S1 (continued)</b>        |                             |                                                   |                |                |
| <i>Hypholoma sublateritium</i> [1] | Hypsu1_138665               | delta-6-protoilludene                             | JGI ID: 138665 | 5              |
| <i>Lignosus rhinoceros</i> [8]     | GME3634                     | alpha-cadinol                                     | KX281943       | /              |
|                                    | GME3638                     | delta-cadinol                                     | KX281944       | /              |
|                                    | GME9210                     | ethanonaphthalene                                 | KX281945       | /              |
| <i>Omphalotus olearius</i> [7]     | Omp1                        | □ alpha-Muurolene                                 | JGI ID: 1311   | 4              |
|                                    | Omp3                        | Germacrene A, alpha-Muurolene                     | JGI ID: 4636   | 7              |
|                                    | Omp4                        | □ delta-Cadinene                                  | JGI ID: 1447   | 5              |
|                                    | Omp5a                       | □ gamma-Cadinene, epi-zonarene,                   | JGI ID: 2392   | 5              |
|                                    | Omp5b                       | gamma-Cadinene,                                   | JGI ID: 2393   | 5              |
|                                    | Omp6                        | delta-6-Protoilludene                             | JGI ID: 4774   | 4              |
|                                    | Omp7                        | delta-6-Protoilludene                             | JGI ID: 2271   | 5              |
|                                    | Omp9                        | alpha-barbatene                                   | JGI ID: 3258   | 4              |
|                                    | Omp10                       | trans-daucadiene                                  | JGI ID: 3981   | 4              |
|                                    | <i>Piloderma rozeum</i> [1] | Pilcr_825684                                      | gamma-Cadinene | JGI ID: 825684 |
| <i>Postia placenta</i> [9]         | PpSTS01                     | □ alpha-Muurolene, delta-Cadinene, □ beta-Elemene | JGI ID:60326   | 6              |
|                                    | PpSTS03                     | □ alpha-Cadinene, gamma-Cadinene                  | JGI ID: 99496  | 4              |
|                                    | PpSTS06                     | □ alpha-Gurjunene                                 | JGI ID: 45581  | 6              |
|                                    | PpSTS08                     | delta-6-Protoilludene                             | JGI ID: 59374  | 5              |
|                                    | PpSTS10                     | □ delta-Cadinene                                  | JGI ID: 98072  | 3              |
|                                    | PpSTS14                     | Pentalenene                                       | JGI ID: 101549 | 11             |
|                                    | PpSTS25                     | linalool, myrcene                                 | JGI ID: 125961 | 5              |
| <i>Stereum hirsutum</i> [4]        | ShSTS1                      | alpha-barbatene, beta-barbatene                   | JGI ID: 159379 | 3              |
|                                    | ShSTS3                      | beta-farnesene, alpha-farnesene                   | JGI ID: 122776 | 7              |
|                                    | ShSTS4                      | hirstene                                          | JGI ID: 52743  | 15             |
|                                    | ShSTS5                      | gamma-cadinene                                    | JGI ID: 161672 | 9              |
|                                    | ShSTS7                      | delta-cadinene                                    | JGI ID: 167646 | 4              |

|                             |         |                                   |                |               |
|-----------------------------|---------|-----------------------------------|----------------|---------------|
|                             | ShSTS8  | alpha-cubebene,<br>1-epi-cubenol  | JGI ID: 146390 | 5             |
|                             | ShSTS10 | germacrene D,<br>delta-cadinene   | JGI ID: 111121 | 4             |
| <b>Table S1 (continued)</b> |         |                                   |                |               |
|                             | ShSTS11 | alpha-cubebene,<br>delta-cadinene | JGI ID: 128017 | 4             |
|                             | ShSTS12 | alpha-cubebene,<br>beta-cubebene  | JGI ID: 111127 | 4             |
|                             | ShSTS13 | beta-caryophyllene                | JGI ID: 50042  | 6             |
|                             | ShSTS15 | delta-6-protoilludene             | JGI ID: 64702  | 5             |
|                             | ShSTS16 | delta-6-protoilludene             | JGI ID: 73029  | 5             |
|                             | ShSTS17 | delta-6-protoilludene             | JGI ID: 69906  | 5             |
|                             | ShSTS18 | delta-6-protoilludene             | JGI ID: 25180  | 5             |
| Termitomyces<br>[10]        | STC4    | Intermedeol                       | /              | 6             |
|                             | STC9    | □ gamma-Cadinene                  | KNZ74377       | 9             |
|                             | STC15   | Germacrene D-4-ol                 | KAG5727529     | 4             |
| Average                     |         |                                   |                | 5.53<br>(5-6) |

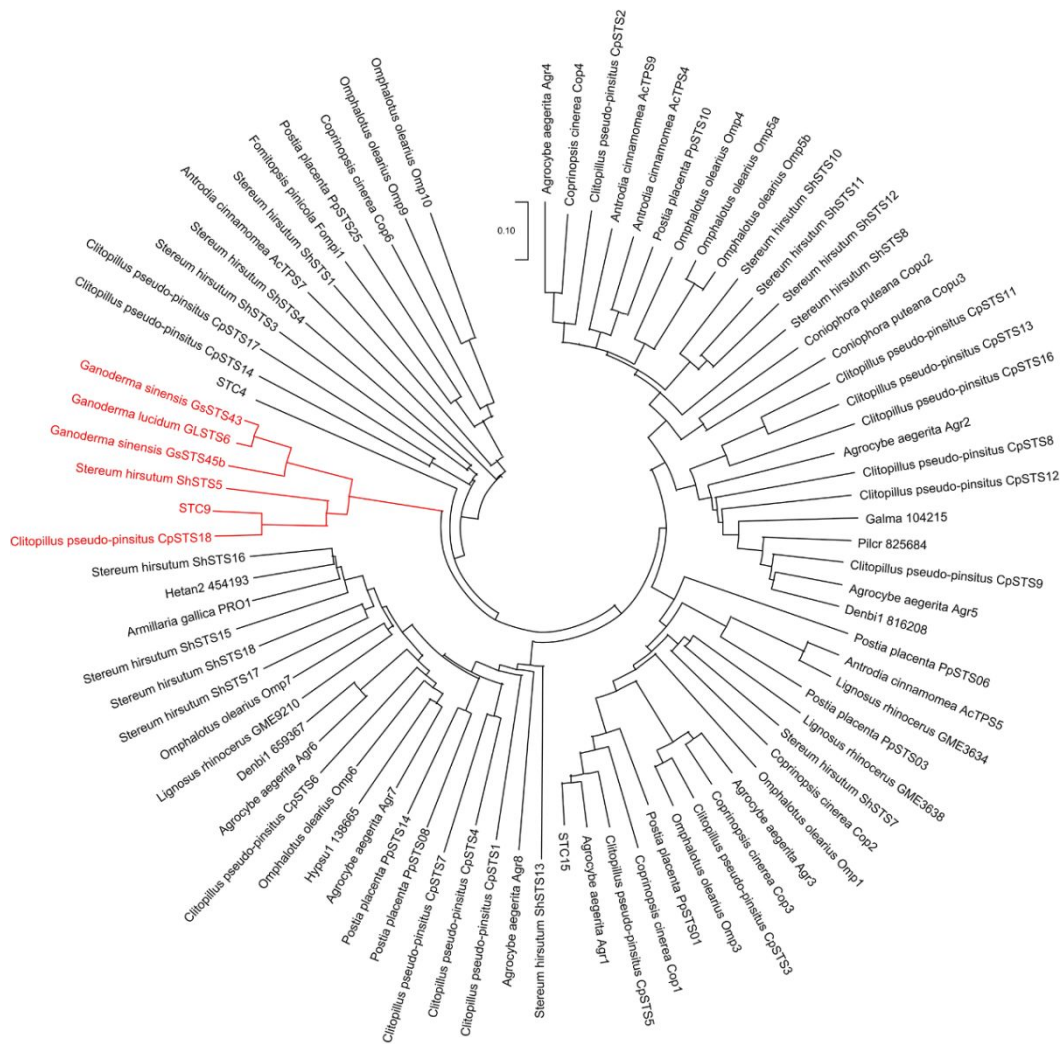

**Figure S1.** The phylogenetic tree of characterized STSs in Basidiomycetes. GISTS6, GsSTS43, and GsSTS45b, like STC9, CpSTS18, and ShSTS5, located in the small red branch.

**Table S2. Protein sequence similarity of the STSs in the small red branch (Figure S1).**

|          | GsSTS43 | GsSTS45b | GL22395 | CpSTS18 | ShSTS5 | STC9 |
|----------|---------|----------|---------|---------|--------|------|
| GsSTS43  |         |          |         |         |        |      |
| GsSTS45b | 0.197   |          |         |         |        |      |
| GL22395  | 0.038   | 0.203    |         |         |        |      |
| CpSTS18  | 0.465   | 0.491    | 0.471   |         |        |      |
| ShSTS5   | 0.461   | 0.478    | 0.467   | 0.417   |        |      |
| STC9     | 0.500   | 0.518    | 0.503   | 0.222   | 0.440  |      |

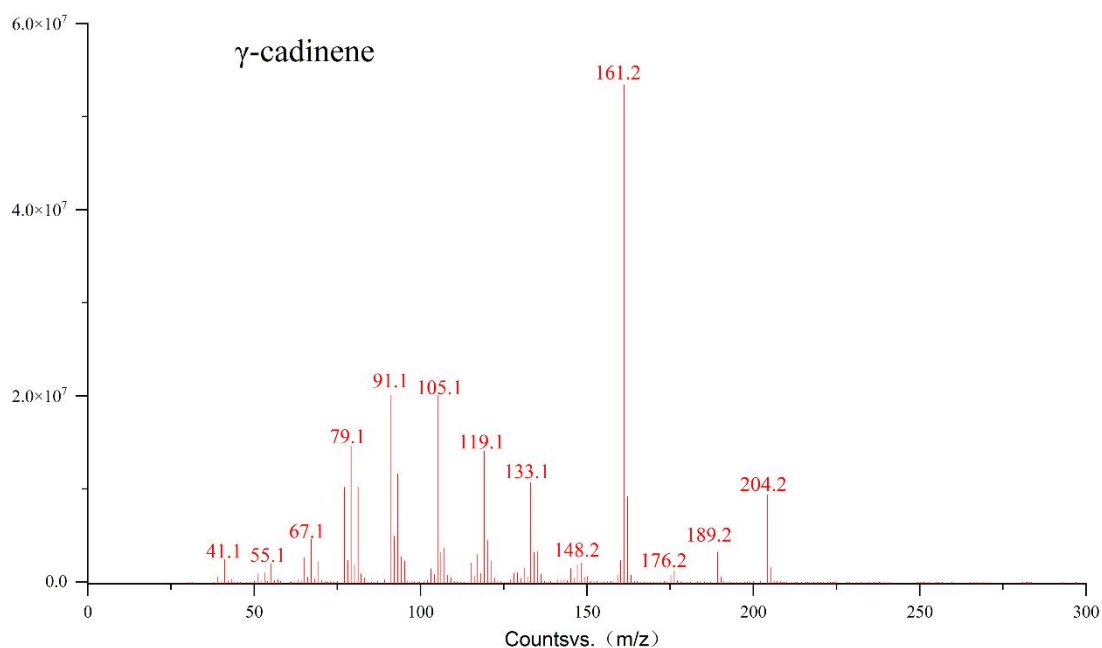

**Figure S2.** The MS spectra for  $\gamma$ -cadinene.

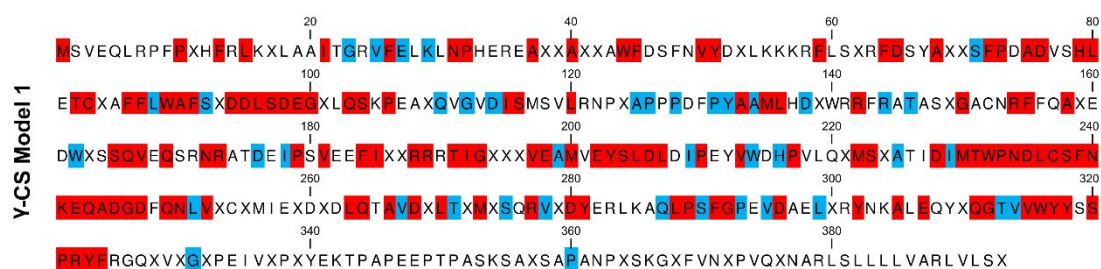

**Figure S3.** Model 1 was recombined according to conservative amino acid motifs of six sequences, GISTS6, GsSTS43, GsSTS45b, STC9, CpSTS18 and ShSTS5. Blue represented that > 80% amino acid motifs were the same. 100% of amino acid motifs was same in red.

**Table S3. 67 sequences retrieved by Model 1 (Figure S3) in NCBI.**

| Description        | Scientific name                | Accession    | comment |
|--------------------|--------------------------------|--------------|---------|
| terpene cyclase    | Moniliophthora roreri MCA 2997 | ESK85067.1   | 1       |
| terpenoid synthase | Gymnopus androsaceus JB14      | KAE9402135.1 | 2       |
| terpenoid synthase | Paxillus ammoniavirescens      | KAF8837143.1 | 3       |
| terpenoid synthase | Gyrodon lividus                | KAF9228206.1 | 4       |
| terpenoid synthase | Marasmius fiardii PR-910       | KAF9255786.1 | 5       |
| terpenoid synthase | Marasmius fiardii PR-910       | KAF9262323.1 | 6       |

|                          |                                          |                        |                     |
|--------------------------|------------------------------------------|------------------------|---------------------|
| terpenoid synthase       | Marasmius fiardii PR-910                 | KAF9266407.1           | 7                   |
| terpenoid synthase       | Suillus variegatus                       | KAG1804596.1           | 8                   |
| terpenoid synthase       | Suillus hirtellus                        | KAG2046364.1           | 9                   |
| terpenoid synthase       | Suillus decipiens                        | KAG2064828.1           | 10                  |
| terpenoid synthase       | Suillus weaverae                         | KAG2344196.1           | 11                  |
| terpenoid synthase       | Suillus spraguei                         | KAG2359861.1           | 12                  |
| terpenoid synthase       | Suillus brevipes Sb2                     | KAG2757286.1           | 13                  |
| terpenoid synthase       | Rhizopogon vinicolor<br>AM-OR11-026      | OAX38211.1             | 14                  |
| terpenoid synthase       | Obba rivulosa                            | OCH88150.1             | 15                  |
| terpene synthase         | Ganoderma sinense<br>ZZ0214-1            | PIL24732.1<br>OK500007 | 16<br>(reannotated) |
| terpene synthase         | Ganoderma sinense<br>ZZ0214-1            | PIL26225.1<br>OK500006 | 17                  |
| terpenoid synthase       | Polyporus brumalis                       | RDX49040.1             | 18                  |
| terpenoid synthase       | Lentinus tigrinus<br>ALCF2SS1-6          | RPD53648.1             | 19                  |
| terpenoid synthase       | Lentinus tigrinus<br>ALCF2SS1-6          | RPD54775.1             | 20                  |
| terpenoid synthase       | Dichomitus squalens                      | TBU24857.1             | 21                  |
| terpene cyclase          | Steccherinum ochraceum                   | TCD60657.1             | 22                  |
| terpenoid synthase       | Polyporus arcularius<br>HHB13444         | TFK81182.1             | 23                  |
| terpenoid synthase       | Polyporus arcularius<br>HHB13444         | TFK90599.1             | 24                  |
| terpenoid synthase       | Dendrothele bispora CBS<br>962.96        | THU89284.1             | 25                  |
| terpenoid synthase       | Stereum hirsutum FP-91666<br>SS1         | XP_007309315.1         | 26                  |
| putative terpene cyclase | Serpula lacrymans var.<br>lacrymans S7.9 | XP_007314914.1         | 27                  |
| terpenoid synthase       | Dichomitus squalens<br>LYAD-421 SS1      | XP_007366915.1         | 28                  |

**Table S3 (continued)**

|                                                 |                                      |                |    |
|-------------------------------------------------|--------------------------------------|----------------|----|
| terpenoid synthase                              | Coniophora puteana<br>RWD-64-598 SS2 | XP_007773189.1 | 29 |
| terpenoid synthase                              | Suillus fuscotomentosus              | XP_041224442.1 | 30 |
| terpenoid synthase                              | Suillus discolor                     | XP_041291209.1 | 31 |
| putative sesquiterpene<br>synthase              | Clitopilus sp.                       | BBH51515.1     | 32 |
| Pentalenene synthase<br>[Termitomyces sp. J132] | Termitomyces sp. J132                | KNZ74377.1     | 33 |

|                                                  |                                        |              |    |
|--------------------------------------------------|----------------------------------------|--------------|----|
| hypothetical protein                             | Termitomyces sp.<br>Mi166#008          | KAG6887643.1 | 34 |
| hypothetical protein<br>D9613_005750             | Agrocybe pediades                      | KAF4617509.1 | 35 |
| hypothetical protein<br>D9756_001012             | Leucoagaricus leucothites              | KAF5363252.1 | 36 |
| hypothetical protein<br>E1B28_011602             | Marasmius oreades                      | KAG7089978.1 | 37 |
| hypothetical protein<br>GYMLUDRAFT_239618        | Gymnopus luxurians<br>FD-317 M1        | KIK65943.1   | 38 |
| hypothetical protein<br>GYMLUDRAFT_257858        | Gymnopus luxurians<br>FD-317 M1        | KIK65941.1   | 39 |
| hypothetical protein<br>GYMLUDRAFT_70394         | Gymnopus luxurians<br>FD-317 M1        | KIK65274.1   | 40 |
| hypothetical protein<br>H0H92_007861             | Tricholoma furcatifolium               | KAG6807361.1 | 41 |
| hypothetical protein<br>HYDPIDRAFT_31051         | Hydnomerulius pinastri<br>MD-312       | KIJ61720.1   | 42 |
| hypothetical protein<br>HYPsudRAFT_202683        | Hypholoma sublateritium<br>FD-334 SS-4 | KJA21771.1   | 43 |
| hypothetical protein<br>M404DRAFT_26981          | Pisolithus tinctorius Marx<br>270      | KIO03692.1   | 44 |
| hypothetical protein<br>PAXINDRAFT_167348        | Paxillus involutus ATCC<br>200175      | KIJ18045.1   | 45 |
| hypothetical protein<br>PAXRUDRAFT_612281        | Paxillus rubicundulus<br>Ve08.2h10     | KIK91798.1   | 46 |
| hypothetical protein<br>PISMIDRAFT_685262        | Pisolithus microcarpus 441             | KIK17499.1   | 47 |
| hypothetical protein<br>SCLCIDRAFT_131396        | Scleroderma citrinum Foug<br>A         | KIM56960.1   | 48 |
| hypothetical protein<br>WG66_13564               | Moniliophthora roreri                  | KTB33869.1   | 49 |
| isoprenoid synthase<br>domain-containing protein | Boletus edulis                         | KAF8124306.1 | 50 |

**Table S3 (continued)**

|                                                  |                         |              |    |
|--------------------------------------------------|-------------------------|--------------|----|
| isoprenoid synthase<br>domain-containing protein | Cyathus striatus        | KAF8991670.1 | 51 |
| isoprenoid synthase<br>domain-containing protein | Infundibulicybe gibba   | KAF8883528.1 | 52 |
| isoprenoid synthase<br>domain-containing protein | Infundibulicybe gibba   | KAF8883523.1 | 53 |
| isoprenoid synthase<br>domain-containing protein | Melanogaster broomeanus | KAF9232893.1 | 54 |



|                                                  |                          |                |    |
|--------------------------------------------------|--------------------------|----------------|----|
| isoprenoid synthase<br>domain-containing protein | Suillus americanus       | KAG2039422.1   | 55 |
| isoprenoid synthase<br>domain-containing protein | Suillus ampliporus       | KAG0702095.1   | 56 |
| isoprenoid synthase<br>domain-containing protein | Suillus clintonianus     | XP_041202483.1 | 57 |
| isoprenoid synthase<br>domain-containing protein | Suillus cothurnatus      | KAG2122404.1   | 58 |
| isoprenoid synthase<br>domain-containing protein | Suillus lakei            | KAG1733514.1   | 59 |
| isoprenoid synthase<br>domain-containing protein | Suillus occidentalis     | KAG1761835.1   | 60 |
| isoprenoid synthase<br>domain-containing protein | Suillus paluster         | XP_041178962.1 | 61 |
| isoprenoid synthase<br>domain-containing protein | Suillus placidus         | KAG1777933.1   | 62 |
| isoprenoid synthase<br>domain-containing protein | Suillus plorans          | XP_041168029.1 | 63 |
| isoprenoid synthase<br>domain-containing protein | Suillus subalutaceus     | XP_041248664.1 | 64 |
| isoprenoid synthase<br>domain-containing protein | Suillus tomentosus       | KAG1844547.1   | 65 |
| Pentalenene synthase                             | Termitomyces sp. T112    | KAG5718178.1   | 66 |
| terpenoid synthase                               | <i>Ganoderma lucidum</i> | OK500005       | 67 |

---

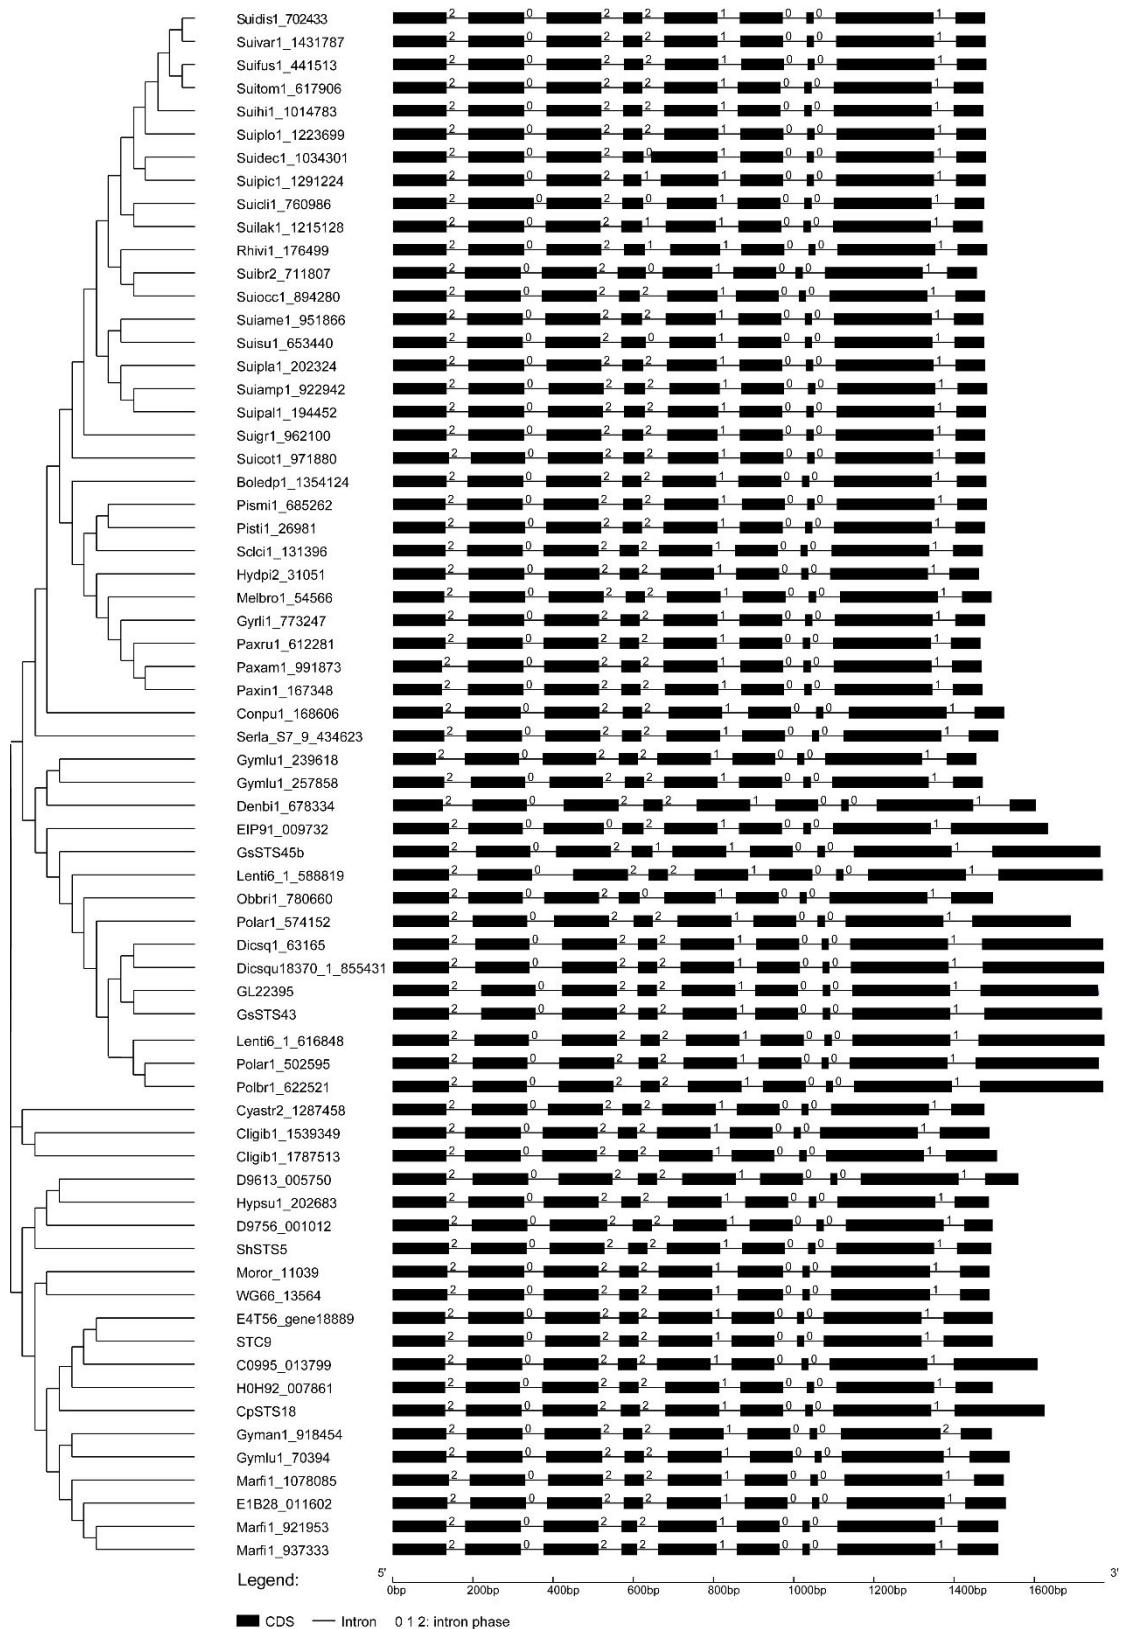

**Figure S4.** Gene structure-phylogenetic tree of 67 sequence were retrieved by Model 1 in NCBI and were created using GSDS (<http://gsds.gao-lab.org/>).

**Table S4. Comparison of Exon/Intron Size for 67 sequences retrieved by Model 1 (Figure S3) in NCBI.**

| Name                 | Exon1 | Intron1 | Exon2 | Intron2 | Exon3 | Intron3 | Exon4 | Intron4 | Exon5 | Intron5 | Exon6 | Intron6 | Exon7 | Intron7 | Exon8 | Intron8 | Exon9 | Length |
|----------------------|-------|---------|-------|---------|-------|---------|-------|---------|-------|---------|-------|---------|-------|---------|-------|---------|-------|--------|
| Moror_11039          | 137   | 52      | 139   | 49      | 137   | 51      | 48    | 50      | 134   | 63      | 113   | 49      | 18    | 53      | 247   | 75      | 74    | 1489   |
| Gyman1_918454        | 134   | 51      | 139   | 55      | 140   | 55      | 48    | 69      | 134   | 60      | 107   | 48      | 18    | 60      | 244   | 55      | 77    | 1494   |
| Paxam1_991873        | 131   | 56      | 139   | 51      | 137   | 55      | 48    | 58      | 134   | 57      | 107   | 51      | 18    | 57      | 244   | 51      | 74    | 1468   |
| Gyrl1_773247         | 131   | 57      | 139   | 50      | 137   | 54      | 48    | 59      | 134   | 55      | 107   | 57      | 18    | 56      | 244   | 56      | 74    | 1476   |
| Marfi1_937333        | 134   | 47      | 139   | 56      | 137   | 58      | 39    | 52      | 146   | 50      | 107   | 57      | 18    | 69      | 244   | 56      | 101   | 1510   |
| Marfi1_1078085       | 140   | 52      | 139   | 57      | 137   | 53      | 48    | 60      | 134   | 58      | 107   | 57      | 18    | 67      | 244   | 79      | 74    | 1524   |
| Marfi1_921953        | 134   | 47      | 139   | 56      | 137   | 58      | 39    | 52      | 146   | 50      | 107   | 57      | 18    | 69      | 244   | 56      | 101   | 1510   |
| Suivar1_1431787      | 134   | 54      | 139   | 56      | 137   | 54      | 48    | 54      | 134   | 56      | 107   | 59      | 18    | 55      | 244   | 55      | 74    | 1478   |
| Suihi1_1014783       | 134   | 54      | 139   | 56      | 137   | 54      | 48    | 54      | 134   | 50      | 107   | 59      | 18    | 55      | 244   | 55      | 74    | 1472   |
| Suidec1_1034301      | 134   | 54      | 139   | 56      | 137   | 53      | 52    | 19      | 166   | 56      | 107   | 59      | 18    | 55      | 244   | 56      | 74    | 1479   |
| Suigr1_962100        | 134   | 54      | 139   | 56      | 137   | 52      | 48    | 55      | 134   | 56      | 107   | 59      | 18    | 55      | 244   | 55      | 74    | 1477   |
| Suipic1_1291224      | 134   | 54      | 139   | 56      | 137   | 55      | 44    | 49      | 144   | 54      | 107   | 59      | 18    | 55      | 244   | 55      | 74    | 1478   |
| Suibr2_711807        | 134   | 46      | 139   | 52      | 137   | 52      | 70    | 43      | 124   | 52      | 107   | 48      | 18    | 55      | 244   | 61      | 74    | 1456   |
| Rhivi1_176499        | 134   | 54      | 139   | 56      | 137   | 56      | 48    | 67      | 125   | 53      | 107   | 60      | 18    | 54      | 244   | 56      | 74    | 1482   |
| Obbri1_780660        | 140   | 48      | 136   | 53      | 137   | 49      | 52    | 62      | 127   | 51      | 107   | 52      | 18    | 56      | 244   | 60      | 104   | 1496   |
| GsSTS45b             | 140   | 67      | 136   | 64      | 137   | 51      | 48    | 54      | 134   | 59      | 107   | 62      | 18    | 72      | 244   | 102     | 269   | 1764   |
| GsSTS43              | 140   | 80      | 136   | 66      | 137   | 53      | 48    | 63      | 134   | 46      | 107   | 62      | 18    | 56      | 244   | 85      | 293   | 1768   |
| Polbr1_622521        | 140   | 59      | 136   | 79      | 137   | 67      | 48    | 70      | 134   | 53      | 107   | 50      | 18    | 52      | 244   | 70      | 308   | 1772   |
| Lenti6_1_616848      | 140   | 64      | 136   | 82      | 137   | 59      | 48    | 65      | 134   | 53      | 107   | 52      | 18    | 52      | 244   | 70      | 314   | 1775   |
| Lenti6_1_588819      | 140   | 71      | 136   | 102     | 137   | 52      | 48    | 66      | 134   | 53      | 107   | 59      | 18    | 62      | 244   | 81      | 260   | 1770   |
| Dicsqu18370_1_855431 | 140   | 65      | 136   | 81      | 137   | 52      | 48    | 58      | 134   | 57      | 107   | 56      | 18    | 53      | 244   | 85      | 302   | 1773   |
| EIP91_009732         | 140   | 48      | 136   | 52      | 150   | 46      | 53    | 51      | 134   | 53      | 107   | 54      | 18    | 55      | 244   | 50      | 242   | 1633   |
| Polar1_502595        | 140   | 60      | 136   | 79      | 137   | 61      | 48    | 64      | 134   | 53      | 107   | 50      | 18    | 52      | 244   | 70      | 308   | 1761   |
| Polar1_574152        | 140   | 59      | 136   | 67      | 137   | 61      | 48    | 62      | 134   | 55      | 107   | 53      | 18    | 52      | 244   | 72      | 245   | 1690   |
| Denbi1_678334        | 125   | 73      | 136   | 92      | 137   | 62      | 48    | 84      | 134   | 62      | 107   | 58      | 18    | 70      | 241   | 91      | 65    | 1603   |
| Stehi1_161672        | 140   | 55      | 139   | 57      | 137   | 59      | 48    | 48      | 134   | 54      | 107   | 58      | 18    | 52      | 244   | 57      | 86    | 1493   |

**Table S4 (continued)**

|                   |     |    |     |    |     |    |    |    |     |    |     |    |    |    |     |    |     |      |
|-------------------|-----|----|-----|----|-----|----|----|----|-----|----|-----|----|----|----|-----|----|-----|------|
| Serla_S7_9_434623 | 128 | 55 | 139 | 58 | 137 | 54 | 48 | 63 | 134 | 55 | 107 | 67 | 18 | 61 | 244 | 68 | 74  | 1510 |
| Dicsq1_63165      | 140 | 65 | 136 | 81 | 137 | 52 | 48 | 58 | 134 | 55 | 107 | 56 | 18 | 53 | 244 | 85 | 302 | 1771 |
| Conpu1_168606     | 125 | 54 | 139 | 60 | 137 | 58 | 48 | 66 | 134 | 65 | 107 | 62 | 18 | 64 | 244 | 69 | 74  | 1524 |
| Suifus1_441513    | 134 | 54 | 139 | 56 | 137 | 56 | 48 | 54 | 134 | 56 | 107 | 59 | 18 | 55 | 244 | 55 | 74  | 1480 |
| Suidis1_702433    | 134 | 54 | 139 | 56 | 137 | 54 | 48 | 54 | 134 | 55 | 107 | 59 | 18 | 55 | 244 | 55 | 74  | 1477 |
| CpSTS18           | 131 | 52 | 139 | 52 | 137 | 58 | 48 | 63 | 134 | 53 | 107 | 55 | 18 | 52 | 244 | 58 | 224 | 1625 |
| STC9              | 131 | 57 | 139 | 53 | 137 | 48 | 48 | 50 | 134 | 48 | 107 | 56 | 18 | 49 | 244 | 55 | 122 | 1496 |
| C0995_013799      | 131 | 53 | 139 | 53 | 137 | 48 | 48 | 50 | 134 | 52 | 107 | 67 | 18 | 53 | 244 | 65 | 209 | 1608 |
| D9613_005750      | 134 | 65 | 139 | 76 | 134 | 63 | 48 | 63 | 134 | 60 | 107 | 68 | 18 | 58 | 244 | 66 | 83  | 1560 |
| D9756_001011      | 140 | 57 | 139 | 56 | 143 | 63 | 48 | 53 | 134 | 57 | 107 | 60 | 18 | 55 | 244 | 51 | 71  | 1496 |
| E1B28_011602      | 137 | 57 | 139 | 52 | 137 | 54 | 48 | 60 | 134 | 60 | 107 | 61 | 18 | 68 | 244 | 52 | 101 | 1529 |
| Gymlu1_239618     | 107 | 72 | 136 | 58 | 134 | 56 | 48 | 48 | 134 | 53 | 107 | 55 | 18 | 52 | 241 | 62 | 74  | 1455 |
| Gymlu1_257858     | 128 | 66 | 136 | 60 | 134 | 54 | 48 | 50 | 134 | 53 | 107 | 54 | 18 | 53 | 241 | 61 | 74  | 1471 |
| Gymlu1_70394      | 134 | 51 | 139 | 59 | 140 | 55 | 48 | 60 | 134 | 71 | 107 | 54 | 18 | 50 | 244 | 65 | 110 | 1539 |
| H0H92_007861      | 131 | 51 | 136 | 55 | 140 | 52 | 48 | 67 | 134 | 53 | 107 | 59 | 18 | 55 | 244 | 54 | 92  | 1496 |
| Hydpi2_31051      | 131 | 58 | 139 | 50 | 137 | 51 | 48 | 53 | 134 | 55 | 107 | 55 | 18 | 54 | 244 | 54 | 74  | 1462 |
| Hypsu1_202683     | 134 | 55 | 139 | 49 | 137 | 56 | 48 | 68 | 134 | 59 | 107 | 52 | 18 | 53 | 244 | 48 | 86  | 1487 |
| Pisti1_26981      | 131 | 60 | 139 | 52 | 137 | 54 | 48 | 54 | 134 | 56 | 107 | 56 | 18 | 54 | 244 | 58 | 74  | 1476 |
| Paxin1_167348     | 131 | 56 | 139 | 51 | 137 | 55 | 48 | 61 | 134 | 56 | 107 | 51 | 18 | 57 | 244 | 51 | 74  | 1470 |
| Paxru1_612281     | 131 | 54 | 139 | 51 | 137 | 54 | 48 | 60 | 134 | 56 | 107 | 51 | 18 | 58 | 244 | 49 | 74  | 1465 |
| Pismi1_685262     | 131 | 54 | 139 | 52 | 137 | 61 | 48 | 55 | 134 | 59 | 107 | 56 | 18 | 56 | 244 | 56 | 74  | 1481 |
| Selci1_131396     | 131 | 54 | 139 | 52 | 137 | 52 | 48 | 50 | 134 | 56 | 107 | 56 | 18 | 60 | 244 | 59 | 74  | 1471 |
| WG66_13564        | 137 | 52 | 139 | 49 | 137 | 51 | 48 | 50 | 134 | 63 | 113 | 49 | 18 | 53 | 247 | 75 | 74  | 1489 |
| Boledp1_1354124   | 134 | 52 | 139 | 57 | 137 | 53 | 48 | 52 | 134 | 55 | 107 | 52 | 18 | 62 | 244 | 62 | 74  | 1480 |
| Cyatr2_1287458    | 134 | 63 | 139 | 51 | 137 | 49 | 48 | 51 | 134 | 52 | 107 | 54 | 18 | 56 | 244 | 56 | 83  | 1476 |
| Cligib1_1539349   | 134 | 47 | 139 | 54 | 137 | 50 | 48 | 50 | 134 | 48 | 107 | 52 | 18 | 48 | 244 | 54 | 125 | 1489 |
| Cligib1_1787513   | 134 | 46 | 139 | 54 | 137 | 53 | 48 | 53 | 134 | 47 | 107 | 62 | 18 | 49 | 244 | 54 | 128 | 1507 |

**Table S4 (continued)**

|                 |     |    |     |    |     |    |    |    |     |    |     |    |    |    |     |    |     |      |
|-----------------|-----|----|-----|----|-----|----|----|----|-----|----|-----|----|----|----|-----|----|-----|------|
| Melbro1_54566   | 128 | 63 | 139 | 58 | 137 | 55 | 48 | 55 | 134 | 55 | 107 | 58 | 18 | 60 | 244 | 60 | 74  | 1493 |
| Suiame1_951866  | 134 | 51 | 139 | 56 | 137 | 52 | 48 | 54 | 134 | 56 | 107 | 59 | 18 | 55 | 244 | 55 | 74  | 1473 |
| Suiamp1_922942  | 134 | 55 | 139 | 60 | 137 | 52 | 48 | 56 | 134 | 53 | 107 | 60 | 18 | 56 | 244 | 55 | 74  | 1482 |
| Suicli1_760986  | 134 | 54 | 163 | 32 | 137 | 52 | 52 | 59 | 124 | 52 | 107 | 60 | 18 | 55 | 244 | 58 | 74  | 1475 |
| Suicot1_971880  | 140 | 54 | 136 | 56 | 137 | 52 | 48 | 54 | 134 | 56 | 107 | 59 | 18 | 52 | 244 | 55 | 74  | 1476 |
| Suilak1_1215128 | 134 | 54 | 139 | 54 | 137 | 51 | 48 | 63 | 125 | 56 | 107 | 56 | 18 | 55 | 244 | 56 | 74  | 1471 |
| Suiocc1_894280  | 134 | 46 | 139 | 52 | 137 | 56 | 48 | 63 | 134 | 46 | 107 | 50 | 18 | 59 | 244 | 69 | 74  | 1476 |
| Suipal1_194452  | 134 | 54 | 139 | 60 | 137 | 52 | 48 | 53 | 134 | 53 | 107 | 60 | 18 | 57 | 244 | 55 | 74  | 1479 |
| Suipla1_202324  | 134 | 54 | 139 | 56 | 137 | 52 | 48 | 54 | 134 | 56 | 107 | 59 | 18 | 56 | 244 | 55 | 74  | 1477 |
| Suiplo1_1223699 | 134 | 54 | 139 | 56 | 137 | 54 | 48 | 55 | 134 | 56 | 107 | 59 | 18 | 55 | 244 | 55 | 74  | 1479 |
| Suisu1_653440   | 134 | 51 | 139 | 56 | 137 | 52 | 61 | 60 | 115 | 56 | 107 | 59 | 18 | 56 | 244 | 55 | 74  | 1474 |
| Suitom1_617906  | 134 | 54 | 139 | 56 | 137 | 54 | 48 | 54 | 134 | 50 | 107 | 59 | 18 | 55 | 244 | 55 | 74  | 1472 |
| E4T56_gene18889 | 131 | 57 | 139 | 53 | 137 | 48 | 48 | 50 | 134 | 48 | 107 | 56 | 18 | 49 | 244 | 55 | 122 | 1496 |
| GlSTS6          | 140 | 80 | 136 | 66 | 137 | 51 | 48 | 62 | 134 | 49 | 107 | 62 | 18 | 55 | 244 | 76 | 296 | 1761 |
| AVERAGE         | 134 | 56 | 139 | 58 | 137 | 54 | 48 | 57 | 134 | 55 | 107 | 57 | 18 | 56 | 244 | 62 | 119 | 1535 |



|                     | 20         | 40       | 60         | 80         | 100       |    |         |           |           |            |            |    |
|---------------------|------------|----------|------------|------------|-----------|----|---------|-----------|-----------|------------|------------|----|
| Suimp1_922942       | QVRYEEL    | PQYQDIAA | GRVCE      | ELRANVHOAE | DRAAARS   | NO | ISVYDDR | KSKFLNYGK | DLFAALSPD | ADLKHLETCL | AFFFWAFS   | 91 |
| Suip1_194452        | QVRYEEL    | PQYQDIAA | GRVCE      | ELRANVHOAE | DRAAARS   | NO | ISVYDDR | KSKFLNYGK | DLFAALSPD | ADLKHLETCL | AFFFWAFS   | 91 |
| Suigr1_962100       | QVRYEEL    | PQYQDIAA | GRVCE      | ELRANVHOAE | DRAAARS   | NO | ISVYDDR | KSKFLNYGK | DLFAALSPD | ADLKHLETCL | AFFFWAFS   | 91 |
| Suip1a1_202324      | QVRYEEL    | PQYQDIAA | GRVCE      | ELRANVHOAE | DRAAARS   | NO | ISVYDDR | KSKFLNYGK | DLFAALSPD | ADLKHLETCL | AFFFWAFS   | 91 |
| Suik1_1215128       | QVRYEEL    | PQYQDIAA | GRVCE      | ELRANVHOAE | DRAAARS   | NO | ISVYDDR | KSKFLNYGK | DLFAALSPD | ADLKHLETCL | AFFFWAFS   | 91 |
| Rhiv1_176499        | QVRYEEL    | PQYQDIAA | GRVCE      | ELRANVHOAE | DRAAARS   | NO | ISVYDDR | KSKFLNYGK | DLFAALSPD | ADLKHLETCL | AFFFWAFS   | 91 |
| Suibr2_711807       | QVRYEEL    | PQYQDIAA | GRVCE      | ELRANVHOAE | DRAAARS   | NO | ISVYDDR | KSKFLNYGK | DLFAALSPD | ADLKHLETCL | AFFFWAFS   | 91 |
| Suiooc1_894280      | QVRYEEL    | PQYQDIAA | GRVCE      | ELRANVHOAE | DRAAARS   | NO | ISVYDDR | KSKFLNYGK | DLFAALSPD | ADLKHLETCL | AFFFWAFS   | 91 |
| Suicid1_760986      | QVRYEEL    | PQYQDIAA | GRVCE      | ELRANVHOAE | DRAAARS   | NO | ISVYDDR | KSKFLNYGK | DLFAALSPD | ADLKHLETCL | AFFFWAFS   | 93 |
| Suidec1_1034301     | QVRYEEL    | PQYQDIAA | GRVCE      | ELRANVHOAE | DRAAARS   | NO | ISVYDDR | KSKFLNYGK | DLFAALSPD | ADLKHLETCL | AFFFWAFS   | 91 |
| Suip1c1_1291224     | QVRYEEL    | PQYQDIAA | GRVCE      | ELRANVHOAE | DRAAARS   | NO | ISVYDDR | KSKFLNYGK | DLFAALSPD | ADLKHLETCL | AFFFWAFS   | 91 |
| Suime1_951866       | QVRYEEL    | PQYQDIAA | GRVCE      | ELRANVHOAE | DRAAARS   | NO | ISVYDDR | KSKFLNYGK | DLFAALSPD | ADLKHLETCL | AFFFWAFS   | 91 |
| Sulfus1_441513      | QVRYEEL    | PQYQDIAA | GRVCE      | ELRANVHOAE | DRAAARS   | NO | ISVYDDR | KSKFLNYGK | DLFAALSPD | ADLKHLETCL | AFFFWAFS   | 91 |
| Suivar1_1431787     | QVRYEEL    | PQYQDIAA | GRVCE      | ELRANVHOAE | DRAAARS   | NO | ISVYDDR | KSKFLNYGK | DLFAALSPD | ADLKHLETCL | AFFFWAFS   | 91 |
| Suidis1_702433      | QVRYEEL    | PQYQDIAA | GRVCE      | ELRANVHOAE | DRAAARS   | NO | ISVYDDR | KSKFLNYGK | DLFAALSPD | ADLKHLETCL | AFFFWAFS   | 91 |
| Suikom1_617906      | QVRYEEL    | PQYQDIAA | GRVCE      | ELRANVHOAE | DRAAARS   | NO | ISVYDDR | KSKFLNYGK | DLFAALSPD | ADLKHLETCL | AFFFWAFS   | 91 |
| Suith1_1014783      | QVRYEEL    | PQYQDIAA | GRVCE      | ELRANVHOAE | DRAAARS   | NO | ISVYDDR | KSKFLNYGK | DLFAALSPD | ADLKHLETCL | AFFFWAFS   | 91 |
| Suip1o1_1223699     | QVRYEEL    | PQYQDIAA | GRVCE      | ELRANVHOAE | DRAAARS   | NO | ISVYDDR | KSKFLNYGK | DLFAALSPD | ADLKHLETCL | AFFFWAFS   | 91 |
| Suisu1_653440       | QVRYEEL    | PQYQDIAA | GRVCE      | ELRANVHOAE | DRAAARS   | NO | ISVYDDR | KSKFLNYGK | DLFAALSPD | ADLKHLETCL | AFFFWAFS   | 91 |
| Paxam1_991873       | QVRYEEL    | PQYQDIAA | GRVCE      | ELRANVHOAE | DRAAARS   | NO | ISVYDDR | KSKFLNYGK | DLFAALSPD | ADLKHLETCL | AFFFWAFS   | 90 |
| Paxin1_167348       | QVRYEEL    | PQYQDIAA | GRVCE      | ELRANVHOAE | DRAAARS   | NO | ISVYDDR | KSKFLNYGK | DLFAALSPD | ADLKHLETCL | AFFFWAFS   | 90 |
| Paxu1_612281        | QVRYEEL    | PQYQDIAA | GRVCE      | ELRANVHOAE | DRAAARS   | NO | ISVYDDR | KSKFLNYGK | DLFAALSPD | ADLKHLETCL | AFFFWAFS   | 90 |
| Gytl1_773247        | QVRYEEL    | PQYQDIAA | GRVCE      | ELRANVHOAE | DRAAARS   | NO | ISVYDDR | KSKFLNYGK | DLFAALSPD | ADLKHLETCL | AFFFWAFS   | 90 |
| Hydp2_31051         | QVRYEEL    | PQYQDIAA | GRVCE      | ELRANVHOAE | DRAAARS   | NO | ISVYDDR | KSKFLNYGK | DLFAALSPD | ADLKHLETCL | AFFFWAFS   | 90 |
| Sclic1_131396       | QVRYEEL    | PQYQDIAA | GRVCE      | ELRANVHOAE | DRAAARS   | NO | ISVYDDR | KSKFLNYGK | DLFAALSPD | ADLKHLETCL | AFFFWAFS   | 90 |
| Melbr1_54566        | QVRYEEL    | PQYQDIAA | GRVCE      | ELRANVHOAE | DRAAARS   | NO | ISVYDDR | KSKFLNYGK | DLFAALSPD | ADLKHLETCL | AFFFWAFS   | 89 |
| Pism1_685262        | QVRYEEL    | PQYQDIAA | GRVCE      | ELRANVHOAE | DRAAARS   | NO | ISVYDDR | KSKFLNYGK | DLFAALSPD | ADLKHLETCL | AFFFWAFS   | 90 |
| Pist1_26981         | QVRYEEL    | PQYQDIAA | GRVCE      | ELRANVHOAE | DRAAARS   | NO | ISVYDDR | KSKFLNYGK | DLFAALSPD | ADLKHLETCL | AFFFWAFS   | 90 |
| Suicott1_971880     | QVRYEEL    | PQYQDIAA | GRVCE      | ELRANVHOAE | DRAAARS   | NO | ISVYDDR | KSKFLNYGK | DLFAALSPD | ADLKHLETCL | AFFFWAFS   | 92 |
| Boledp1_1354124     | QVRYEEL    | PQYQDIAA | GRVCE      | ELRANVHOAE | DRAAARS   | NO | ISVYDDR | KSKFLNYGK | DLFAALSPD | ADLKHLETCL | AFFFWAFS   | 91 |
| Seria_57_9_434623   | QVRYEEL    | PQYQDIAA | GRVCE      | ELRANVHOAE | DRAAARS   | NO | ISVYDDR | KSKFLNYGK | DLFAALSPD | ADLKHLETCL | AFFFWAFS   | 89 |
| Compul1_168606      | QVRYEEL    | PQYQDIAA | GRVCE      | ELRANVHOAE | DRAAARS   | NO | ISVYDDR | KSKFLNYGK | DLFAALSPD | ADLKHLETCL | AFFFWAFS   | 88 |
| Clipl1_1539349      | QVRYEEL    | PQYQDIAA | GRVCE      | ELRANVHOAE | DRAAARS   | NO | ISVYDDR | KSKFLNYGK | DLFAALSPD | ADLKHLETCL | AFFFWAFS   | 91 |
| Cliplb1_1787513     | QVRYEEL    | PQYQDIAA | GRVCE      | ELRANVHOAE | DRAAARS   | NO | ISVYDDR | KSKFLNYGK | DLFAALSPD | ADLKHLETCL | AFFFWAFS   | 91 |
| Cystr2_1287458      | QVRYEEL    | PQYQDIAA | GRVCE      | ELRANVHOAE | DRAAARS   | NO | ISVYDDR | KSKFLNYGK | DLFAALSPD | ADLKHLETCL | AFFFWAFS   | 91 |
| ShSt55              | QVRYEEL    | PQYQDIAA | GRVCE      | ELRANVHOAE | DRAAARS   | NO | ISVYDDR | KSKFLNYGK | DLFAALSPD | ADLKHLETCL | AFFFWAFS   | 93 |
| Merf1_921953        | QVRYEEL    | PQYQDIAA | GRVCE      | ELRANVHOAE | DRAAARS   | NO | ISVYDDR | KSKFLNYGK | DLFAALSPD | ADLKHLETCL | AFFFWAFS   | 91 |
| Merf1_937333        | QVRYEEL    | PQYQDIAA | GRVCE      | ELRANVHOAE | DRAAARS   | NO | ISVYDDR | KSKFLNYGK | DLFAALSPD | ADLKHLETCL | AFFFWAFS   | 90 |
| E1B29_011602        | QVRYEEL    | PQYQDIAA | GRVCE      | ELRANVHOAE | DRAAARS   | NO | ISVYDDR | KSKFLNYGK | DLFAALSPD | ADLKHLETCL | AFFFWAFS   | 92 |
| Merf1_1078085       | QVRYEEL    | PQYQDIAA | GRVCE      | ELRANVHOAE | DRAAARS   | NO | ISVYDDR | KSKFLNYGK | DLFAALSPD | ADLKHLETCL | AFFFWAFS   | 93 |
| Gyman1_918454       | QVRYEEL    | PQYQDIAA | GRVCE      | ELRANVHOAE | DRAAARS   | NO | ISVYDDR | KSKFLNYGK | DLFAALSPD | ADLKHLETCL | AFFFWAFS   | 91 |
| Gymu1_70394         | QVRYEEL    | PQYQDIAA | GRVCE      | ELRANVHOAE | DRAAARS   | NO | ISVYDDR | KSKFLNYGK | DLFAALSPD | ADLKHLETCL | AFFFWAFS   | 91 |
| E4T56_gene18889     | QVRYEEL    | PQYQDIAA | GRVCE      | ELRANVHOAE | DRAAARS   | NO | ISVYDDR | KSKFLNYGK | DLFAALSPD | ADLKHLETCL | AFFFWAFS   | 90 |
| STC9                | QVRYEEL    | PQYQDIAA | GRVCE      | ELRANVHOAE | DRAAARS   | NO | ISVYDDR | KSKFLNYGK | DLFAALSPD | ADLKHLETCL | AFFFWAFS   | 90 |
| C0995_013799        | QVRYEEL    | PQYQDIAA | GRVCE      | ELRANVHOAE | DRAAARS   | NO | ISVYDDR | KSKFLNYGK | DLFAALSPD | ADLKHLETCL | AFFFWAFS   | 90 |
| CpST518             | QVRYEEL    | PQYQDIAA | GRVCE      | ELRANVHOAE | DRAAARS   | NO | ISVYDDR | KSKFLNYGK | DLFAALSPD | ADLKHLETCL | AFFFWAFS   | 90 |
| Dicsq1_63165        | QVRYEEL    | PQYQDIAA | GRVCE      | ELRANVHOAE | DRAAARS   | NO | ISVYDDR | KSKFLNYGK | DLFAALSPD | ADLKHLETCL | AFFFWAFS   | 93 |
| Dicsq18730_1_855431 | QVRYEEL    | PQYQDIAA | GRVCE      | ELRANVHOAE | DRAAARS   | NO | ISVYDDR | KSKFLNYGK | DLFAALSPD | ADLKHLETCL | AFFFWAFS   | 93 |
| GL22369             | QVRYEEL    | PQYQDIAA | GRVCE      | ELRANVHOAE | DRAAARS   | NO | ISVYDDR | KSKFLNYGK | DLFAALSPD | ADLKHLETCL | AFFFWAFS   | 93 |
| GeST543             | QVRYEEL    | PQYQDIAA | GRVCE      | ELRANVHOAE | DRAAARS   | NO | ISVYDDR | KSKFLNYGK | DLFAALSPD | ADLKHLETCL | AFFFWAFS   | 93 |
| Polar1_502595       | QVRYEEL    | PQYQDIAA | GRVCE      | ELRANVHOAE | DRAAARS   | NO | ISVYDDR | KSKFLNYGK | DLFAALSPD | ADLKHLETCL | AFFFWAFS   | 93 |
| Polar1_574152       | QVRYEEL    | PQYQDIAA | GRVCE      | ELRANVHOAE | DRAAARS   | NO | ISVYDDR | KSKFLNYGK | DLFAALSPD | ADLKHLETCL | AFFFWAFS   | 93 |
| Lenf6_1_616848      | QVRYEEL    | PQYQDIAA | GRVCE      | ELRANVHOAE | DRAAARS   | NO | ISVYDDR | KSKFLNYGK | DLFAALSPD | ADLKHLETCL | AFFFWAFS   | 93 |
| Polar1_574152       | QVRYEEL    | PQYQDIAA | GRVCE      | ELRANVHOAE | DRAAARS   | NO | ISVYDDR | KSKFLNYGK | DLFAALSPD | ADLKHLETCL | AFFFWAFS   | 93 |
| Lenf6_1_588919      | QVRYEEL    | PQYQDIAA | GRVCE      | ELRANVHOAE | DRAAARS   | NO | ISVYDDR | KSKFLNYGK | DLFAALSPD | ADLKHLETCL | AFFFWAFS   | 93 |
| GeST545b            | QVRYEEL    | PQYQDIAA | GRVCE      | ELRANVHOAE | DRAAARS   | NO | ISVYDDR | KSKFLNYGK | DLFAALSPD | ADLKHLETCL | AFFFWAFS   | 93 |
| Obn1_780660         | QVRYEEL    | PQYQDIAA | GRVCE      | ELRANVHOAE | DRAAARS   | NO | ISVYDDR | KSKFLNYGK | DLFAALSPD | ADLKHLETCL | AFFFWAFS   | 93 |
| EIP91_009732        | QVRYEEL    | PQYQDIAA | GRVCE      | ELRANVHOAE | DRAAARS   | NO | ISVYDDR | KSKFLNYGK | DLFAALSPD | ADLKHLETCL | AFFFWAFS   | 93 |
| D9756_001012        | QVRYEEL    | PQYQDIAA | GRVCE      | ELRANVHOAE | DRAAARS   | NO | ISVYDDR | KSKFLNYGK | DLFAALSPD | ADLKHLETCL | AFFFWAFS   | 93 |
| Hypu1_202983        | QVRYEEL    | PQYQDIAA | GRVCE      | ELRANVHOAE | DRAAARS   | NO | ISVYDDR | KSKFLNYGK | DLFAALSPD | ADLKHLETCL | AFFFWAFS   | 91 |
| D9613_005750        | QVRYEEL    | PQYQDIAA | GRVCE      | ELRANVHOAE | DRAAARS   | NO | ISVYDDR | KSKFLNYGK | DLFAALSPD | ADLKHLETCL | AFFFWAFS   | 91 |
| Denb1_678334        | QVRYEEL    | PQYQDIAA | GRVCE      | ELRANVHOAE | DRAAARS   | NO | ISVYDDR | KSKFLNYGK | DLFAALSPD | ADLKHLETCL | AFFFWAFS   | 88 |
| H0H92_007861        | QVRYEEL    | PQYQDIAA | GRVCE      | ELRANVHOAE | DRAAARS   | NO | ISVYDDR | KSKFLNYGK | DLFAALSPD | ADLKHLETCL | AFFFWAFS   | 89 |
| Gymu1_239818        | QVRYEEL    | PQYQDIAA | GRVCE      | ELRANVHOAE | DRAAARS   | NO | ISVYDDR | KSKFLNYGK | DLFAALSPD | ADLKHLETCL | AFFFWAFS   | 82 |
| Gymu1_257858        | QVRYEEL    | PQYQDIAA | GRVCE      | ELRANVHOAE | DRAAARS   | NO | ISVYDDR | KSKFLNYGK | DLFAALSPD | ADLKHLETCL | AFFFWAFS   | 82 |
| Moror_11039         | QVRYEEL    | PQYQDIAA | GRVCE      | ELRANVHOAE | DRAAARS   | NO | ISVYDDR | KSKFLNYGK | DLFAALSPD | ADLKHLETCL | AFFFWAFS   | 92 |
| WG66_13564          | QVRYEEL    | PQYQDIAA | GRVCE      | ELRANVHOAE | DRAAARS   | NO | ISVYDDR | KSKFLNYGK | DLFAALSPD | ADLKHLETCL | AFFFWAFS   | 92 |
| Consensus           | MQ--RYEELP | SQYQDIAA | ITGRV--FEL | K-VNPHQAE  | DRAARAFNS | -- | ISVYDDR | KSKFLNYGK | DLFAALSPD | ADLKHLETCL | AFFFWAFS-- | 91 |

|                 | 120        | 140         | 160 | 180 | 200      |            |       |   |    |           |     |
|-----------------|------------|-------------|-----|-----|----------|------------|-------|---|----|-----------|-----|
| Suimp1_922942   | DAVAQAGHDI | SVSYVTPNPDG | SRP | QYV | YAAALYDL | LTRFRGISTV | YAYHR | Y | IR | FEAFWSSSV | 166 |
| Suip1_194452    | DAVAQAGHDI | SVSYVTPNPDG | SRP | QYV | YAAALYDL | LTRFRGISTV | YAYHR | Y | IR | FEAFWSSSV | 166 |
| Suigr1_962100   | DAVAQAGHDI | SVSYVTPNPDG | SRP | QYV | YAAALYDL | LTRFRGISTV | YAYHR | Y | IR | FEAFWSSSV | 166 |
| Suip1a1_202324  | DAVAQAGHDI | SVSYVTPNPDG | SRP | QYV | YAAALYDL | LTRFRGISTV | YAYHR | Y | IR | FEAFWSSSV | 166 |
| Suik1_1215128   | DAVAQAGHDI | SVSYVTPNPDG | SRP | QYV | YAAALYDL | LTRFRGISTV | YAYHR | Y | IR | FEAFWSSSV | 163 |
| Rhiv1_176499    | DAVAQAGHDI | SVSYVTPNPDG | SRP | QYV | YAAALYDL | LTRFRGISTV | YAYHR | Y | IR | FEAFWSSSV | 170 |
| Suibr2_711807   | DAVAQAGHDI | SVSYVTPNPDG | SRP | QYV | YAAALYDL | LTRFRGISTV | YAYHR | Y | IR | FEAFWSSSV | 166 |
| Suiooc1_894280  | DAVAQAGHDI | SVSYVTPNPDG | SRP | QYV | YAAALYDL | LTRFRGISTV | YAYHR | Y | IR | FEAFWSSSV | 166 |
| Suicid1_760986  | DAVAQAGHDI | SVSYVTPNPDG | SRP | QYV | YAAALYDL | LTRFRGISTV | YAYHR | Y | IR | FEAFWSSSV | 172 |
| Suidec1_1034301 | DAVAQAGHDI | SVSYVTPNPDG | SRP | QYV | YAAALYDL | LTRFRGISTV | YAYHR | Y | IR | FEAFWSSSV | 178 |
| Suip1c1_1291224 | DAVAQAGHDI | SVSYVTPNPDG | SRP | QYV | YAAALYDL | LTRFRGISTV | YAYHR | Y | IR | FEAFWSSSV | 168 |
| Suime1_951866   | DAVAQAGHDI | SVSYVTPNPDG | SRP | QYV | YAAALYDL | LTRFRGISTV | YAYHR | Y | IR | FEAFWSSSV | 168 |
| Sulfus1_441513  | DAVAQAGHDI | SVSYVTPNPDG | SRP | QYV | YAAALYDL | LTRFRGISTV | YAYHR | Y | IR | FEAFWSSSV | 166 |
| Suivar1_1431787 | DAVAQAGHDI | SVSYVTPNPDG | SRP | QYV | YAAALYDL | LTRFRGISTV | YAYHR | Y | IR | FEAFWSSSV | 166 |
| Suidis1_702433  | DAVAQAGHDI | SVSYVTPNPDG | SRP | QYV | YAAALYDL | LTRFRGISTV | YAYHR | Y | IR | FEAFWSSSV | 166 |
| Suikom1_617906  | DAVAQAGHDI | SVSYVTPNPDG | SRP | QYV | YAAALYDL | LTRFRGISTV | YAYHR | Y | IR | FEAFWSSSV | 166 |
| Suith1_1014783  | DAVAQAGHDI | SVSYVTPNPDG | SRP | QYV | YAAALYDL | LTRFRGISTV | YAYHR | Y | IR | FEAFWSSSV | 166 |
| Suip1o1_1223699 | DAVAQAGHDI | SVSYVTPNPDG | SRP | QYV | YAAALYDL | LTRFRGISTV | YAYHR | Y |    |           |     |



|                   | 220       | 240       | 260      | 280      | 300     |           |           |           |           |          |     |
|-------------------|-----------|-----------|----------|----------|---------|-----------|-----------|-----------|-----------|----------|-----|
| Suimp1_922942     | SRFRSDDR  | MPFVDELLM | ATIGGALL | FAMVYSDD | DLDVDFE | NPIIKAMSD | TTLLMTWPN | LCSEFKQAD | GDYQLVFCI | MHERDVLG | 263 |
| Suipal1_194452    | TSRFRSDDR | MPFVDELLM | ATIGGALL | FAMVYSDD | DLDVDFE | NPIIKAMSD | TTLLMTWPN | LCSEFKQAD | GDYQLVFCI | MHERDVLG | 263 |
| Suigr1_962100     | TSRFRSDDR | MPFVDELLM | ATIGGALL | FAMVYSDD | DLDVDFE | NPIIKAMSD | TTLLMTWPN | LCSEFKQAD | GDYQLVFCI | MHERDVLG | 263 |
| Suipal1_202324    | TSRFRSDDR | MPFVDELLM | ATIGGALL | FAMVYSDD | DLDVDFE | NPIIKAMSD | TTLLMTWPN | LCSEFKQAD | GDYQLVFCI | MHERDVLG | 263 |
| Suik1_121528      | TSRFRSDDR | MPFVDELLM | ATIGGALL | FAMVYSDD | DLDVDFE | NPIIKAMSD | TTLLMTWPN | LCSEFKQAD | GDYQLVFCI | MHERDVLG | 260 |
| Rhiv1_176499      | TSRFRSDDR | MPFVDELLM | ATIGGALL | FAMVYSDD | DLDVDFE | NPIIKAMSD | TTLLMTWPN | LCSEFKQAD | GDYQLVFCI | MHERDVLG | 263 |
| Suibr2_711807     | TSRFRSDDR | MPFVDELLM | ATIGGALL | FAMVYSDD | DLDVDFE | NPIIKAMSD | TTLLMTWPN | LCSEFKQAD | GDYQLVFCI | MHERDVLG | 267 |
| Suiccc1_894280    | TSRFRSDDR | MPFVDELLM | ATIGGALL | FAMVYSDD | DLDVDFE | NPIIKAMSD | TTLLMTWPN | LCSEFKQAD | GDYQLVFCI | MHERDVLG | 263 |
| Suicr1_760986     | TSRFRSDDR | MPFVDELLM | ATIGGALL | FAMVYSDD | DLDVDFE | NPIIKAMSD | TTLLMTWPN | LCSEFKQAD | GDYQLVFCI | MHERDVLG | 269 |
| Suidec1_1034301   | TSRFRSDDR | MPFVDELLM | ATIGGALL | FAMVYSDD | DLDVDFE | NPIIKAMSD | TTLLMTWPN | LCSEFKQAD | GDYQLVFCI | MHERDVLG | 275 |
| Suipc1_1291224    | TSRFRSDDR | MPFVDELLM | ATIGGALL | FAMVYSDD | DLDVDFE | NPIIKAMSD | TTLLMTWPN | LCSEFKQAD | GDYQLVFCI | MHERDVLG | 265 |
| Suime1_951866     | TSRFRSDDR | MPFVDELLM | ATIGGALL | FAMVYSDD | DLDVDFE | NPIIKAMSD | TTLLMTWPN | LCSEFKQAD | GDYQLVFCI | MHERDVLG | 263 |
| Suifus1_441513    | TSRFRSDDR | MPFVDELLM | ATIGGALL | FAMVYSDD | DLDVDFE | NPIIKAMSD | TTLLMTWPN | LCSEFKQAD | GDYQLVFCI | MHERDVLG | 263 |
| Suiver1_1431787   | TSRFRSDDR | MPFVDELLM | ATIGGALL | FAMVYSDD | DLDVDFE | NPIIKAMSD | TTLLMTWPN | LCSEFKQAD | GDYQLVFCI | MHERDVLG | 263 |
| Suid1_702433      | TSRFRSDDR | MPFVDELLM | ATIGGALL | FAMVYSDD | DLDVDFE | NPIIKAMSD | TTLLMTWPN | LCSEFKQAD | GDYQLVFCI | MHERDVLG | 263 |
| Suikom1_817906    | TSRFRSDDR | MPFVDELLM | ATIGGALL | FAMVYSDD | DLDVDFE | NPIIKAMSD | TTLLMTWPN | LCSEFKQAD | GDYQLVFCI | MHERDVLG | 263 |
| Suith1_1014783    | TSRFRSDDR | MPFVDELLM | ATIGGALL | FAMVYSDD | DLDVDFE | NPIIKAMSD | TTLLMTWPN | LCSEFKQAD | GDYQLVFCI | MHERDVLG | 263 |
| Suiplo1_1223699   | TSRFRSDDR | MPFVDELLM | ATIGGALL | FAMVYSDD | DLDVDFE | NPIIKAMSD | TTLLMTWPN | LCSEFKQAD | GDYQLVFCI | MHERDVLG | 263 |
| Suisu1_853440     | TSRFRSDDR | MPFVDELLM | ATIGGALL | FAMVYSDD | DLDVDFE | NPIIKAMSD | TTLLMTWPN | LCSEFKQAD | GDYQLVFCI | MHERDVLG | 261 |
| Paxam1_991873     | TSRFRSDDR | MPFVDELLM | ATIGGALL | FAMVYSDD | DLDVDFE | NPIIKAMSD | TTLLMTWPN | LCSEFKQAD | GDYQLVFCI | MHERDVLG | 262 |
| Paxin1_187348     | TSRFRSDDR | MPFVDELLM | ATIGGALL | FAMVYSDD | DLDVDFE | NPIIKAMSD | TTLLMTWPN | LCSEFKQAD | GDYQLVFCI | MHERDVLG | 262 |
| Paxu1_612281      | TSRFRSDDR | MPFVDELLM | ATIGGALL | FAMVYSDD | DLDVDFE | NPIIKAMSD | TTLLMTWPN | LCSEFKQAD | GDYQLVFCI | MHERDVLG | 262 |
| Cytl1_773247      | TSRFRSDDR | MPFVDELLM | ATIGGALL | FAMVYSDD | DLDVDFE | NPIIKAMSD | TTLLMTWPN | LCSEFKQAD | GDYQLVFCI | MHERDVLG | 262 |
| Hydp2_31051       | TSRFRSDDR | MPFVDELLM | ATIGGALL | FAMVYSDD | DLDVDFE | NPIIKAMSD | TTLLMTWPN | LCSEFKQAD | GDYQLVFCI | MHERDVLG | 262 |
| Solc1_131396      | TSRFRSDDR | MPFVDELLM | ATIGGALL | FAMVYSDD | DLDVDFE | NPIIKAMSD | TTLLMTWPN | LCSEFKQAD | GDYQLVFCI | MHERDVLG | 262 |
| Melbr1_54566      | TSRFRSDDR | MPFVDELLM | ATIGGALL | FAMVYSDD | DLDVDFE | NPIIKAMSD | TTLLMTWPN | LCSEFKQAD | GDYQLVFCI | MHERDVLG | 261 |
| Pisml1_585262     | TSRFRSDDR | MPFVDELLM | ATIGGALL | FAMVYSDD | DLDVDFE | NPIIKAMSD | TTLLMTWPN | LCSEFKQAD | GDYQLVFCI | MHERDVLG | 262 |
| Psh1_26581        | TSRFRSDDR | MPFVDELLM | ATIGGALL | FAMVYSDD | DLDVDFE | NPIIKAMSD | TTLLMTWPN | LCSEFKQAD | GDYQLVFCI | MHERDVLG | 262 |
| Suicr1_971880     | TSRFRSDDR | MPFVDELLM | ATIGGALL | FAMVYSDD | DLDVDFE | NPIIKAMSD | TTLLMTWPN | LCSEFKQAD | GDYQLVFCI | MHERDVLG | 264 |
| Boledp1_1354124   | TSRFRSDDR | MPFVDELLM | ATIGGALL | FAMVYSDD | DLDVDFE | NPIIKAMSD | TTLLMTWPN | LCSEFKQAD | GDYQLVFCI | MHERDVLG | 263 |
| Seria_57_9_434623 | TSRFRSDDR | MPFVDELLM | ATIGGALL | FAMVYSDD | DLDVDFE | NPIIKAMSD | TTLLMTWPN | LCSEFKQAD | GDYQLVFCI | MHERDVLG | 261 |
| Conpu1_188606     | TSRFRSDDR | MPFVDELLM | ATIGGALL | FAMVYSDD | DLDVDFE | NPIIKAMSD | TTLLMTWPN | LCSEFKQAD | GDYQLVFCI | MHERDVLG | 260 |
| Clipl1_1539349    | TSRFRSDDR | MPFVDELLM | ATIGGALL | FAMVYSDD | DLDVDFE | NPIIKAMSD | TTLLMTWPN | LCSEFKQAD | GDYQLVFCI | MHERDVLG | 264 |
| Clipl1_1787513    | TSRFRSDDR | MPFVDELLM | ATIGGALL | FAMVYSDD | DLDVDFE | NPIIKAMSD | TTLLMTWPN | LCSEFKQAD | GDYQLVFCI | MHERDVLG | 263 |
| Cys2r2_1287458    | TSRFRSDDR | MPFVDELLM | ATIGGALL | FAMVYSDD | DLDVDFE | NPIIKAMSD | TTLLMTWPN | LCSEFKQAD | GDYQLVFCI | MHERDVLG | 263 |
| SHST5             | TSRFRSDDR | MPFVDELLM | ATIGGALL | FAMVYSDD | DLDVDFE | NPIIKAMSD | TTLLMTWPN | LCSEFKQAD | GDYQLVFCI | MHERDVLG | 265 |
| Merf1_921953      | TSRFRSDDR | MPFVDELLM | ATIGGALL | FAMVYSDD | DLDVDFE | NPIIKAMSD | TTLLMTWPN | LCSEFKQAD | GDYQLVFCI | MHERDVLG | 264 |
| Merf1_937333      | TSRFRSDDR | MPFVDELLM | ATIGGALL | FAMVYSDD | DLDVDFE | NPIIKAMSD | TTLLMTWPN | LCSEFKQAD | GDYQLVFCI | MHERDVLG | 264 |
| EIB29_011602      | TSRFRSDDR | MPFVDELLM | ATIGGALL | FAMVYSDD | DLDVDFE | NPIIKAMSD | TTLLMTWPN | LCSEFKQAD | GDYQLVFCI | MHERDVLG | 264 |
| Merf1_1078085     | TSRFRSDDR | MPFVDELLM | ATIGGALL | FAMVYSDD | DLDVDFE | NPIIKAMSD | TTLLMTWPN | LCSEFKQAD | GDYQLVFCI | MHERDVLG | 265 |
| Gyman1_918454     | TSRFRSDDR | MPFVDELLM | ATIGGALL | FAMVYSDD | DLDVDFE | NPIIKAMSD | TTLLMTWPN | LCSEFKQAD | GDYQLVFCI | MHERDVLG | 264 |
| Gymlu1_70394      | TSRFRSDDR | MPFVDELLM | ATIGGALL | FAMVYSDD | DLDVDFE | NPIIKAMSD | TTLLMTWPN | LCSEFKQAD | GDYQLVFCI | MHERDVLG | 264 |
| E4T6_gene16869    | TSRFRSDDR | MPFVDELLM | ATIGGALL | FAMVYSDD | DLDVDFE | NPIIKAMSD | TTLLMTWPN | LCSEFKQAD | GDYQLVFCI | MHERDVLG | 262 |
| STC9              | TSRFRSDDR | MPFVDELLM | ATIGGALL | FAMVYSDD | DLDVDFE | NPIIKAMSD | TTLLMTWPN | LCSEFKQAD | GDYQLVFCI | MHERDVLG | 262 |
| C0995_013799      | TSRFRSDDR | MPFVDELLM | ATIGGALL | FAMVYSDD | DLDVDFE | NPIIKAMSD | TTLLMTWPN | LCSEFKQAD | GDYQLVFCI | MHERDVLG | 262 |
| CpST518           | TSRFRSDDR | MPFVDELLM | ATIGGALL | FAMVYSDD | DLDVDFE | NPIIKAMSD | TTLLMTWPN | LCSEFKQAD | GDYQLVFCI | MHERDVLG | 262 |
| Dicsq1_63165      | TSRFRSDDR | MPFVDELLM | ATIGGALL | FAMVYSDD | DLDVDFE | NPIIKAMSD | TTLLMTWPN | LCSEFKQAD | GDYQLVFCI | MHERDVLG | 264 |
| G2                | TSRFRSDDR | MPFVDELLM | ATIGGALL | FAMVYSDD | DLDVDFE | NPIIKAMSD | TTLLMTWPN | LCSEFKQAD | GDYQLVFCI | MHERDVLG | 264 |
| GeST543           | TSRFRSDDR | MPFVDELLM | ATIGGALL | FAMVYSDD | DLDVDFE | NPIIKAMSD | TTLLMTWPN | LCSEFKQAD | GDYQLVFCI | MHERDVLG | 264 |
| Polr1_502595      | TSRFRSDDR | MPFVDELLM | ATIGGALL | FAMVYSDD | DLDVDFE | NPIIKAMSD | TTLLMTWPN | LCSEFKQAD | GDYQLVFCI | MHERDVLG | 264 |
| Polr1_622521      | TSRFRSDDR | MPFVDELLM | ATIGGALL | FAMVYSDD | DLDVDFE | NPIIKAMSD | TTLLMTWPN | LCSEFKQAD | GDYQLVFCI | MHERDVLG | 264 |
| Lenf6_1_816848    | TSRFRSDDR | MPFVDELLM | ATIGGALL | FAMVYSDD | DLDVDFE | NPIIKAMSD | TTLLMTWPN | LCSEFKQAD | GDYQLVFCI | MHERDVLG | 264 |
| Polr1_574152      | TSRFRSDDR | MPFVDELLM | ATIGGALL | FAMVYSDD | DLDVDFE | NPIIKAMSD | TTLLMTWPN | LCSEFKQAD | GDYQLVFCI | MHERDVLG | 264 |
| Lenf6_1_586819    | TSRFRSDDR | MPFVDELLM | ATIGGALL | FAMVYSDD | DLDVDFE | NPIIKAMSD | TTLLMTWPN | LCSEFKQAD | GDYQLVFCI | MHERDVLG | 264 |
| GeST545           | TSRFRSDDR | MPFVDELLM | ATIGGALL | FAMVYSDD | DLDVDFE | NPIIKAMSD | TTLLMTWPN | LCSEFKQAD | GDYQLVFCI | MHERDVLG | 264 |
| Obn1_780660       | TSRFRSDDR | MPFVDELLM | ATIGGALL | FAMVYSDD | DLDVDFE | NPIIKAMSD | TTLLMTWPN | LCSEFKQAD | GDYQLVFCI | MHERDVLG | 263 |
| EIP91_009732      | TSRFRSDDR | MPFVDELLM | ATIGGALL | FAMVYSDD | DLDVDFE | NPIIKAMSD | TTLLMTWPN | LCSEFKQAD | GDYQLVFCI | MHERDVLG | 270 |
| D9756_001012      | TSRFRSDDR | MPFVDELLM | ATIGGALL | FAMVYSDD | DLDVDFE | NPIIKAMSD | TTLLMTWPN | LCSEFKQAD | GDYQLVFCI | MHERDVLG | 267 |
| Hypu1_202883      | TSRFRSDDR | MPFVDELLM | ATIGGALL | FAMVYSDD | DLDVDFE | NPIIKAMSD | TTLLMTWPN | LCSEFKQAD | GDYQLVFCI | MHERDVLG | 267 |
| D9613_005750      | TSRFRSDDR | MPFVDELLM | ATIGGALL | FAMVYSDD | DLDVDFE | NPIIKAMSD | TTLLMTWPN | LCSEFKQAD | GDYQLVFCI | MHERDVLG | 262 |
| Denb1_878334      | TSRFRSDDR | MPFVDELLM | ATIGGALL | FAMVYSDD | DLDVDFE | NPIIKAMSD | TTLLMTWPN | LCSEFKQAD | GDYQLVFCI | MHERDVLG | 259 |
| H0H92_007861      | TSRFRSDDR | MPFVDELLM | ATIGGALL | FAMVYSDD | DLDVDFE | NPIIKAMSD | TTLLMTWPN | LCSEFKQAD | GDYQLVFCI | MHERDVLG | 262 |
| Gymlu1_239618     | TSRFRSDDR | MPFVDELLM | ATIGGALL | FAMVYSDD | DLDVDFE | NPIIKAMSD | TTLLMTWPN | LCSEFKQAD | GDYQLVFCI | MHERDVLG | 252 |
| Gymlu1_257858     | TSRFRSDDR | MPFVDELLM | ATIGGALL | FAMVYSDD | DLDVDFE | NPIIKAMSD | TTLLMTWPN | LCSEFKQAD | GDYQLVFCI | MHERDVLG | 259 |
| Moror_11039       | TSRFRSDDR | MPFVDELLM | ATIGGALL | FAMVYSDD | DLDVDFE | NPIIKAMSD | TTLLMTWPN | LCSEFKQAD | GDYQLVFCI | MHERDVLG | 267 |
| WG66_13564        | TSRFRSDDR | MPFVDELLM | ATIGGALL | FAMVYSDD | DLDVDFE | NPIIKAMSD | TTLLMTWPN | LCSEFKQAD | GDYQLVFCI | MHERDVLG | 267 |
| Consensus         | TSRFRSDDR | MPFVDELLM | ATIGGALL | FAMVYSDD | DLDVDFE | NPIIKAMSD | TTLLMTWPN | LCSEFKQAD | GDYQLVFCI | MHERDVLG | 267 |

|                 | 320      | 340      | 360      | 380      | 400      |          |      |     |          |     |     |
|-----------------|----------|----------|----------|----------|----------|----------|------|-----|----------|-----|-----|
| Suimp1_922942   | EVINLEED | NEVNDVVF | ISQFSSVD | VAEERLHL | ALNEFVDT | LWYLSRPR | RGVD | VTN | RENLVVPI | FGA | 343 |
| Suipal1_194452  | EVINLEED | NEVNDVVF | ISQFSSVD | VAEERLHL | ALNEFVDT | LWYLSRPR | RGVD | VTN | RENLVVPI | FGA | 343 |
| Suigr1_962100   | EVINLEED | NEVNDVVF | ISQFSSVD | VAEERLHL | ALNEFVDT | LWYLSRPR | RGVD | VTN | RENLVVPI | FGA | 343 |
| Suipal1_202324  | EVINLEED | NEVNDVVF | ISQFSSVD | VAEERLHL | ALNEFVDT | LWYLSRPR | RGVD | VTN | RENLVVPI | FGA | 343 |
| Suik1_121528    | EVINLEED | NEVNDVVF | ISQFSSVD | VAEERLHL | ALNEFVDT | LWYLSRPR | RGVD | VTN | RENLVVPI | FGA | 340 |
| Rhiv1_176499    | EVINLEED | NEVNDVVF | ISQFSSVD | VAEERLHL | ALNEFVDT | LWYLSRPR | RGVD | VTN | RENLVVPI | FGA | 347 |
| Suibr2_711807   | EVINLEED | NEVNDVVF | ISQFSSVD | VAEERLHL | ALNEFVDT | LWYLSRPR | RGVD | VTN | RENLVVPI | FGA | 340 |
| Suiccc1_894280  | EVINLEED | NEVNDVVF | ISQFSSVD | VAEERLHL | ALNEFVDT | LWYLSRPR | RGVD | VTN | RENLVVPI | FGA | 343 |
| Suicr1_760986   | EVINLEED | NEVNDVVF | ISQFSSVD | VAEERLHL | ALNEFVDT | LWYLSRPR | RGVD | VTN | RENLVVPI | FGA | 349 |
| Suidec1_1034301 | EVINLEED | NEVNDVVF | ISQFSSVD | VAEERLHL | ALNEFVDT | LWYLSRPR | RGVD | VTN | RENLVVPI | FGA | 355 |
| Suipc1_1291224  | EVINLEED | NEVNDVVF | ISQFSSVD | VAEERLHL | ALNEFVDT | LWYLSRPR | RGVD | VTN | RENLVVPI | FGA | 345 |
| Suime1_951866   | EVINLEED | NEVNDVVF | ISQFSSVD | VAEERLHL | ALNEFVDT | LWYLSRPR | RGVD | VTN | RENLVVPI | FGA | 342 |
| Suifus1_441513  | EVINLEED | NEVNDVVF | ISQFSSVD | VAEERLHL | ALNEFVDT | LWYLSRPR | RGVD | VTN | RENLVVPI | FGA | 343 |
| Suiver1_1431787 | EVINLEED | NEVNDVVF | ISQFSSVD | VAEERLHL | ALNEFVDT | LWYLSRPR | RGVD | VTN | RENLVVPI | FGA | 343 |
| Suid1_702433    | EVINLEED | NEVNDVVF | ISQFSSVD | VAEERLHL | ALNEFVDT | LWYLSRPR | RGVD | VTN | RENLVVPI | FGA | 343 |
| Suikom1_817906  | EVINLEED | NEVNDVVF | ISQFSSVD | VAEERLHL | ALNEFVDT | LWYLSRPR | RGVD | VTN | RENLVVPI | FGA | 343 |
| Suith1_1014783  | EVINLEED | NEVNDVVF | ISQFSSVD | VAEERLHL | ALNEFVDT | LWYLSRPR | RGVD | VTN | RENLVVPI | FGA | 343 |
| Suiplo1_1223699 | EVINLEED | NEVNDVVF | ISQFSSVD | VAEERLHL | ALNEFVDT | LWYLSRPR | RGVD | VTN | RENLVVPI | FGA | 343 |
| Suisu1_853440   | EVINLEED | NEVNDVVF | ISQFSSVD | VAEERLHL | ALNEFVDT | LWYLSRPR | RGVD | VTN | RENLVVPI | FGA | 341 |
| Paxam1_991873   | EVINLEED | NEVNDVVF | ISQFSSVD | VAEERLHL | ALNEFVDT | LWYLSRPR | RGVD | VTN | RENLVVPI | FGA | 342 |
| Paxin1_187348   | EVINLEED | NEVNDVVF | ISQFSSVD | VAEERLHL | ALNEFVDT | LWYLSRPR | RGVD | VTN | RENLVVPI | FGA | 342 |
| Paxu1_612281    | EVINLEED | NEVNDVVF | ISQFSSVD | VAEERLHL | ALNEFVDT | LWYLSRPR | RGVD | VTN | RENLVVPI | FGA | 342 |
| Cytl1_7         |          |          |          |          |          |          |      |     |          |     |     |



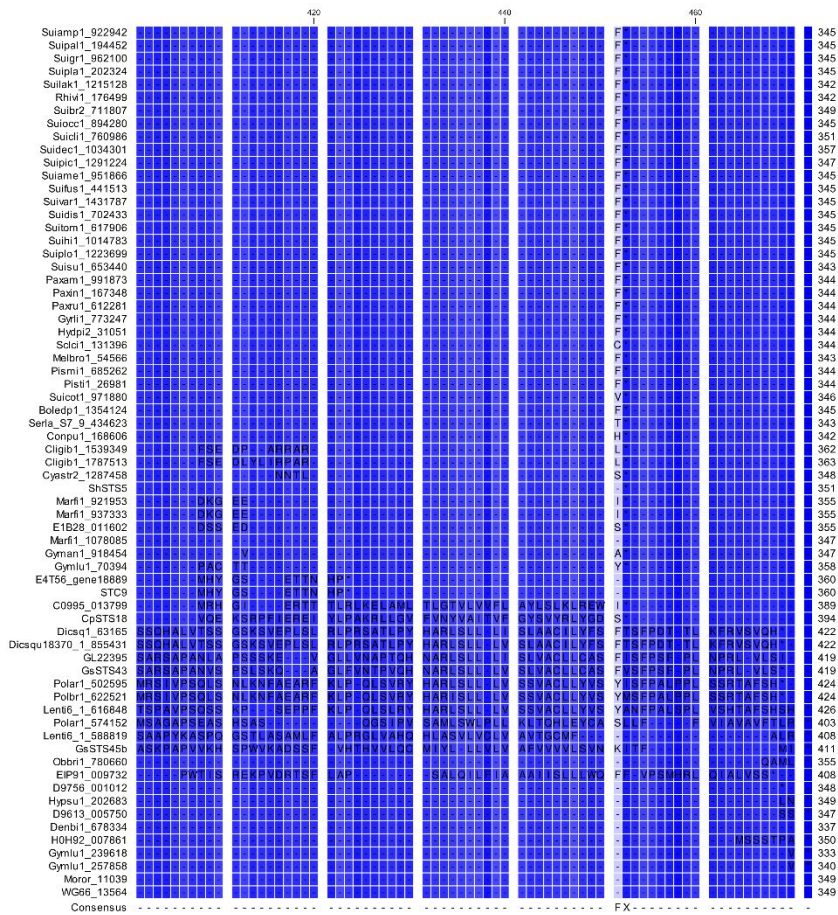

**Figure S5.** Amino acid sequence alignments of 67 sequences using CLC Genomics Workbench 12 software. Amino acids range from low (blue) to high (red) conservation.



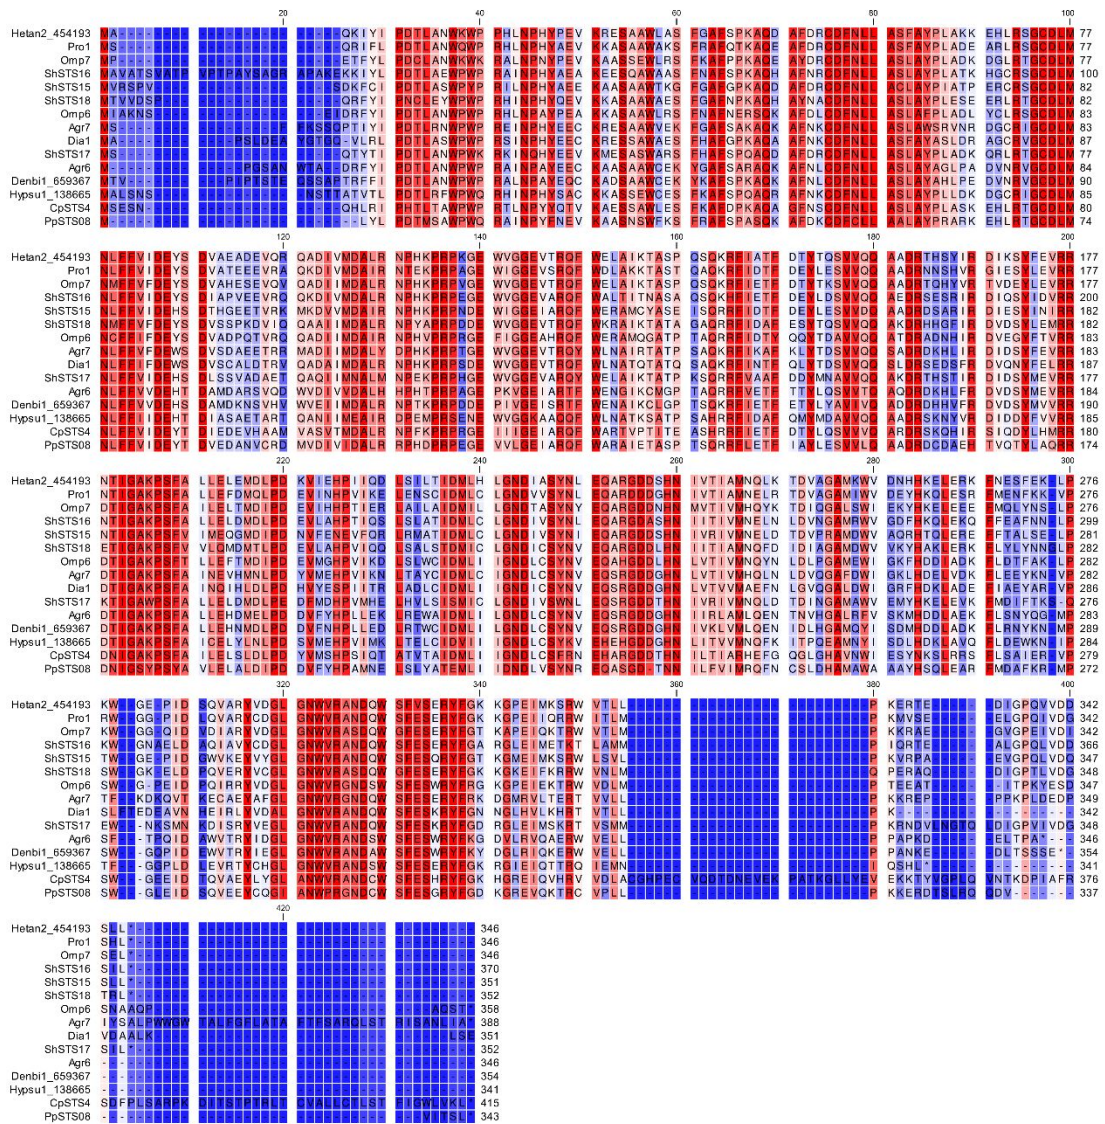

**Figure S6.** Amino acid sequence alignments of 15 characterized delta-6-protoilludene synthases using CLC Genomics Workbench 12 software. Amino acids range from low (blue) to high (red) conservation.

**Table S5. Primers and plasmids used for cloning and expressing  $\gamma$ -CSs in *G. lucidum* and *G. sinensis*.**

| Constructed plasmids                                   | Name         | 5' -3' Sequences                                                     |
|--------------------------------------------------------|--------------|----------------------------------------------------------------------|
| pGEM <sup>®</sup> T Easy -GsSTS43/<br>pet32a-GsSTS43   | 43-F<br>43-R | cgggatccATGAGCGTTCGAGCAGCTCCGTTCA<br>ccaagctTGAAAGGACCAGCCGGGGTTGAG  |
| pGEM <sup>®</sup> T Easy -GsSTS45b/<br>pet32a-GsSTS45b | 45-F<br>45-R | cgggatccATGAGCATCGAACAGCTCCATC<br>ccaagcttAATCATGAAAGTGATTTTGTGTTGAC |
| pGEM <sup>®</sup> T Easy-GISTS6/<br>pet32a-GISTS6      | 6-F<br>6-R   | cgggatccATGAGCGTTCGAGCAGCTTCGC<br>ccctcagTCAGATCGACAGAACGAGGCGG      |
| Pet32a                                                 | T7<br>T7-Ter | TAATACGACTCACTATAGGG<br>GCTAGTTATTGCTCAGCGG                          |

**The cloned coding sequences from *G. lucidum* and *G. sinensis*.**

>GISTS6

ATGAGCGTCGAGCAGCTTCGCCATTCCCCACCCACTTCCGACTCAAGGACCTTGCAG  
CAATATCCGGGCGAGTATTCGAGTTCAAGCTCAATCCGCACGAGAAGGAGGCCGCGA  
AGGCGACGTATGCATGGTTTGATGGCCGCAATGTGTACCACGGTCTAAAGAAGAAGA  
GATTCCTATCACACCGCTTCGACTCATATGCAGGCATGAGCTTTCGGACGCCGACGT  
TTCGCATCTGGAGACCTGCATTGCGTTCTTCCTATGGGCGTTTTCGTTTGACGATCTCT  
CCGACGAGGGCGCGTTGCAATCCAAGCCAGAAGCGCACCCAGGTCGGCGTGGATATCT  
CCATGGAAGTCCTTCGGAATCCGACCCGCCCGCCCCCAATTTCCCTTATGCCGCGAT  
GCTCCACGATATTTGGCGACGCTTTCGGGAAACCGCGAGCCCAGGGGCTTGCAACAG  
GTTCTTCCGCGCCGTCGAGAGCTGGATGAACTCTCAAGTTGAGCAGGCACGCAACCG  
CGTACAGACGAAATTCCTCGTTGAGGAGTTCATTATCCTCCGACGCCGAACCATC  
GGAGGACCAATTGTCGAAGCCATGGTCGAGTATTCGTTAGATCTGCAGATTCCGGAG  
CACGTTTGGGACCACCCTATTCTCCAAGAGATGTCGAAGGCCGTGATTGACATCATGA  
CCTGGCCAAATGACCTCTGTTCTTTCAACAAGGAGCAGGCCGGACGGAGATTTCCAAA  
ACCTCGTCTTCTGCATTATGATTGAACGCGACTGCGATCTCCAGACTGCGGTTCGACGT  
TCTACCGAGATGCTCTCACAACGCGTGGTCGACTACGAGCGCTATCGGGCACAACCT  
CCCAAGTTTCGGACCTGAGGTCGACGCCGAGCTCGCACGCTACAACAAGCGATGGA  
GCAGTACACGCAAGGAACCGTTGTCTGGTACTACCACAGTCCCCGCTACTTCCGCGGT  
CAAGAAGTTACCGGCATCCCCGAGATTGTCGTTCCGGTCTATGAGCGCACGACTCCG  
GCCCCGGAAGAACCTACTGCACCCGCCTCCAAGTCGGCAAGGTCTGCGCCCGCAAT  
CTAGCACCAAGCTCGTCGAAGGAGGTTGGGTTGCTTGTCAACGCTCCGACGCAGCAC  
AACGCCCGCCTATCGTTGCTGCTCATCTCTTGTGCGTTGTTTGTCTGCGCTAGCTT  
CATCTCCTTCCCGTCCTTCCCTCTCAATCCCCGCCTCGTTCTGTCGATCTGA

>GsSTS43

ATGAGCGTCGAGCAGCTCCGTCCATTCCCCACCCACTTCCGGCTCAAGGATCTTGCAG  
CTATCTCCGGACGAGTGTTTCGAGTTCAAGCTCAATCCGCACGAGAGAGAGGCCGCGG  
AGGCGACGCATGCATGGTTTCGACAGCCGCAATGTGTACCACGGTCTTAAGAAGAAGA  
GATTTCTCTCTCATCGTTTTGACTCATAACGCCGCATGAGTTTCCAGACGCCGACGT  
TTCGCATCTGGAAACTTGTATTGCATTCTTCTCTGGGCGTTTTCGTTTCGACGATCTCT  
CCGACGAGGGCGCACTGCAATCCAACCAGAAGCTCACCAGGTCGGAGTGGATATTT  
CCATGGAAGTCCTACGGAATCCGGACGCCCGCCGCCCAATTTCCCTTACGCTGCGAT  
GCTCCACGACATTTGGCGACGCTTTCGGGCAACCGCGAGCCCAGGGGCTTGCAACAG  
ATTCTTCCACGCCGTCGAGAGCTGGATGAACTCTCAAGTGGAACAGGCACGCAACCG  
GGCCACAGACGAAATTCCTCGGTCGAGGAGTTCATTATCCTCCGACGCCGAACCAT  
CGGAGGACCAATTGTCGAAGCTATGGTCGAATATTCGTTAGATTTACATATCCCCGAA  
CAAGTTTGGGATCACCCGGTTCTTCAAGAGATGTCGAAGGCCGTGATTGATATCATGA  
CTTGGCCCAACGACCTTTGTTCTTTAATAAGGAGCAGGCCGACGGAGATTTCCAAA  
CCTCGTCTTCTGCATTATGATTGAGCGCGACTGCGATCTCCAACCCTGTCGACGTT  
CTCACCGAGATGCTCTCTCAGCGCGTGATCGACTACGAGCGCCACAGAGCTCAACTTC  
CGAGTTTGGACCCGAGGTCGATGCTGAGCTCGCTCGCTACAACAAGGCCATAGAGC  
AGTACACGCAAGGAACCGTTGTGTGGTATTACCACAGTCTCGCTACTTCCGCGGTCA  
AGAAGTCACCGGCATCCCCGAGATCGTCGTTCCGGTTTACGAGCGGACTACCCCGGC

GCCGGAAGAACCTACTCCATCCGCGTCTAAATCGGCCAGGTCTGCGCCAGCGAACGT  
ATCGCCGAGCTTGTCTGAAGCAGGCAGGCTTGTTCGTCAACACTCCGGTTCAGCATAAC  
GCGCGTTTATCATTACTGCTCGTCTCTCTGGTCGCGTGCTTGTCTGCGCCAGCTTCGT  
CTCTTTCCCGTCGTTCCCTCTCAACCCCGGCTGGTCTTTCATAA

>GsSTS45a

ATGAGCATCGAACAGCTCCATCCCCTCCCTTCTCATTTCGACTCAAGGACCTCGCTG  
CAATAACCGGACGTGTTTTCGAGTTGAGGCTCAATCCTCAGGAAAGGGAGGCGGCAA  
CTGCGGCCCATGCATGGTTCGATAGCCACCATGTATATCAAGATCTAAACAAACATA  
GGTTCATATCACACGCATTCGATTCTTACGCAGGGATGGCCTTCCCCGATGCCGACGT  
TTCTCACCTGGAGACGTGCATTACCTTCTTTCTGTGGGCGTTCTCGTTCGATGACCTCT  
CCGACGAGGGTACCTTCCAGTCCAACCCTCAAGCCCACCAGGCCGCGGTGGATATCT  
CCATGAAAGTCCTGCGCAACCCCGCCGCGCCGCCCCGGACTTCCCTTTCGCCGCCAT  
GCTTCACGATATCTGGAGTCGCTTCAGAGCAACCGCAAGCTCGGGAGCATGCAACAG  
GCCTGTGCATTTTTACCGTCTATTTCTCTCCTGATTCTCAATCACATTTCCAGATTCTT  
TCGCGCCGTGGAAGGTTGGATGCGCTCCCAGGTCGAGCAGATTTCGTAACCGGGCTAT  
CGACGAGATTCCCTCCGTTAACGATTTTATCATCCTTCGGCGCCAGACAATCGGAGGG  
CCAATCGTAGAATCGATGATTGAGTACTCATTGGACTTACGTATCCCCGAGGACGTTT  
GGGATCACCCCATCCTTCAAGACATGTCCAATGCCTTGATTGACCTCATGACATGGCC  
CAATGATCTATGTTCTTTTAAACAAGGAGCAAGCGGACGGCGATTTCCAGAACCTCGTC  
TTCTGCATCATGATTGAGCAGGACTGCCCCCTCCAAACCGCGGTAGACATCCTCACCG  
ACATGCTCTCGCAGCGTCTGGTCGACTACGAGGAGTTGAAAGCACAGCTCCCAAGTT  
TCGGACCCGAGGTTGATGCAGAGCTCACACGCTACATCAAAGCCATCGAACACTACA  
CGCAGGGAACGGTTGTGTGGTATTACAGCAGCCCTCGCTACTTCCGTGGACAGGCCG  
TATCCGGCATCCCCGAGATCGTCGTCGCGGTCTATGAGAAGAGCGCATCAATGCAGG  
ACACGACCCTTACACCGACTGCCAAAGCGTCCAAGCCTGCGCCAGTTGTTAAGCACA  
GTCCATGGGTCAAGGCTGATTCGTCTTCGTCCACACACGTCGTTCTCCAGTGCAT  
GATCTACTTGTGCTGGTGCTCGTCGCTTTCGTGGTCGTCGTGTTATCTGTCAACAAAA  
TCACTTTCATGATTTAA

>GsSTS45b

ATGAGCATCGAACAGCTCCATCCCCTCCCTTCTCATTTCGACTCAAGGACCTCGCTG  
CAATAACCGGACGTGTTTTCGAGTTGAGGCTCAATCCTCAGGAAAGGGAGGCGGCAA  
CTGCGGCCCATGCATGGTTCGATAGCCACCATGTATATCAAGATCTAAACAAACATA  
GGTTCATATCACACGCATTCGATTCTTACGCAGGGATGGCCTTCCCCGATGCCGACGT  
TTCTCACCTGGAGACGTGCATTACCTTCTTTCTGTGGGCGTTCTCGTTCGATGACCTCT  
CCGACGAGGGTACCTTCCAGTCCAACCCTCAAGCCCACCAGGCCGCGGTGGATATCT  
CCATGAAAGTCCTGCGCAACCCCGCCGCGCCGCCCCGGACTTCCCTTTCGCCGCCAT  
GCTTCACGATATCTGGAGTCGCTTCAGAGCAACCGCAAGCTCGGGAGCATGCAACAG  
ATTCTTTCGCGCCGTGGAAGGTTGGATGCGCTCCCAGGTCGAGCAGATTTCGTAACCGG  
GCTATCGACGAGATTCCCTCCGTTAACGATTTTATCATCCTTCGGCGCCAGACAATCG  
GAGGGCCAATCGTAGAATCGATGATTGAGTACTCATTGGACTTACGTATCCCCGAGG  
ACGTTTGGGATCACCCATCCTTCAAGACATGTCCAATGCCTTGATTGACCTCATGAC  
ATGGCCAATGATCTATGTTCTTTTAAACAAGGAGCAAGCGGACGGCGATTTCCAGAA  
CCTCGTCTTCTGCATCATGATTGAGCAGGACTGCCCCCTCCAAACCGCGGTAGACATC  
CTCACCGACATGCTCTCGCAGCGTCTGGTCGACTACGAGGAGTTGAAAGCACAGCTC

CCAAGTTTCGGACCCGAGGTTGATGCAGAGCTCACACGCTACATCAAAGCCATCGAA  
CACTACACGCAGGGAACGGTTGTGTGGTATTACAGCAGCCCTCGCTACTTCCGTGGAC  
AGGCCGTATCCGGCATCCCCGAGATCGTTCGTCGCCGGTCTATGAGAAGAGCGCATCAA  
TGCAGGACACGACCCTTACACCGACTGCCAAAGCGTCCAAGCCTGCGCCAGTTGTTA  
AGCACAGTCCATGGGTCAAGGCTGATTCGTCCTTCGTCCACACACACGTCGTTCTCCA  
GTGCATGATCTACTTGTGCTGGTGCTCGTCGCTTTCGTGGTCGTCGTGTTATCTGTCA  
ACAAAATCACTTTCATGATTTAA

## REFERENCES

- (1) Zhang, C.; Chen, X.; Orban, A.; Shukal, S.; Birk, F.; Too, H. P.; Rühl, M. *Agrocybe aegerita* Serves As a Gateway for Identifying Sesquiterpene Biosynthetic Enzymes in Higher Fungi. *ACS Chem. Biol.* **2020**, *15*, 1268-1277.
- (2) Lin, Y. L.; Ma, L. T.; Lee, Y. R.; Shaw, J. F.; Wang, S. Y.; Chu, F. H. Differential Gene Expression Network in Terpenoid Synthesis of *Antrodia cinnamomea* in Mycelia and Fruiting Bodies. *J. Agric. Food Chem.* **2017**, *65*, 1874-1886.
- (3) Engels, B.; Heinig, U.; Grothe, T.; Stadler, M.; Jennewein, S. Cloning and characterization of an *Armillaria gallica* cDNA encoding protoilludene synthase, which catalyzes the first committed step in the synthesis of antimicrobial melleolides. *J. Biol. Chem.* **2011**, *286*, 6871-6878.
- (4) Nagamine, S.; Liu, C.; Nishishita, J.; Kozaki, T.; Sogahata, K.; Sato, Y.; Minami, A.; Ozaki, T.; Schmidt-Dannert, C.; Maruyama, J. I.; Oikawa, H. *Ascomycete Aspergillus oryzae* Is an Efficient Expression Host for Production of Basidiomycete Terpenes by Using Genomic DNA Sequences. *Appl. Environ. Microbiol.* **2019**, *85*, e00409–00419.
- (5) Mischko, W.; Hirte, M.; Fuchs, M.; Mehlmer, N.; Brück, T. B. Identification of sesquiterpene synthases from the Basidiomycota *Coniophora puteana* for the efficient and highly selective  $\beta$ -copaene and cubebol production in *E. coli*. *Microb. Cell Fact.* **2018**, *17*, 164.
- (6) Agger, S.; Lopez-Gallego, F.; Schmidt-Dannert, C. Diversity of sesquiterpene synthases in the basidiomycete *Coprinus cinereus*. *Mol. Microbiol.* **2019**, *72*, 1181-1195.
- (7) Wawrzyn, G. T.; Quin, M. B.; Choudhary, S.; López-Gallego, F.; Schmidt-Dannert, C. Draft genome of *Omphalotus olearius* provides a predictive framework for sesquiterpenoid natural product biosynthesis in Basidiomycota. *Chem. Biol.* **2012**, *19*, 772-783.
- (8) Yap, H. Y.; Muria-Gonzalez, M. J.; Kong, B. H.; Stubbs, K. A.; Tan, C. S.; Ng, S. T.; Tan, N. H.; Solomon, P. S.; Fung, S. Y.; Chooi, Y. H. Heterologous expression of cytotoxic sesquiterpenoids from the medicinal mushroom *Lignosus rhinocerotis* in yeast. *Microb. Cell Fact.* **2017**, *16*, 103.
- (9) Ichinose, H.; Kitaoka, T. Insight into metabolic diversity of the brown-rot basidiomycete *Postia placenta* responsible for sesquiterpene biosynthesis: semi-comprehensive screening of cytochrome P450 monooxygenase involved in protoilludene metabolism. *Microb. Biotechnol.* **2018**, *11*, 952-965.
- (10) Burkhardt, I.; Kreuzenbeck, N. B.; Beemelmans, C.; Dickschat, J. S. Mechanistic characterization of three sesquiterpene synthases from the termite-associated fungus *Termitomyces*. *Org. Biomol. Chem.* **2019**, *17*, 3348-3355.
